# Supplementary material for: Transcriptional correlates of malaria in RTS,S/AS01-vaccinated African children: a matched case–control study
Source: eLife. 2022 Jan 21;11:e70393. doi: 10.7554/eLife.70393 (PMC8782572; doi:10.7554/eLife.70393)
Supplement: Figure 2—source data 2. [file elife-70393-fig2-data2.csv]

Annotation	BTM	Stimulation	Direction	PValue	FDR	is_significant
Antigen Presentation	enriched in antigen presentation (II) (M95.0)	DMSO	Down	3.99E-06	4.09E-05	TRUE
Antigen Presentation	enriched in antigen presentation (III) (M95.1)	DMSO	Down	8.75E-05	6.09E-04	TRUE
Antigen Presentation	antigen processing and presentation (M200)	DMSO	Down	5.03E-04	0.002470075	TRUE
Antigen Presentation	regulation of antigen presentation and immune response (M5.0)	DMSO	Down	0.001349269	0.006057358	TRUE
Antigen Presentation	antigen presentation (lipids and proteins) (M28)	DMSO	Down	0.008340661	0.028850483	TRUE
Antigen Presentation	enriched in antigen presentation (I) (M71)	DMSO	Down	0.015715996	0.050243563	TRUE
Antiviral/IFN	type I interferon response (M127)	DMSO	Up	8.52E-23	8.99E-21	TRUE
Antiviral/IFN	innate antiviral response (M150)	DMSO	Up	3.58E-12	1.51E-10	TRUE
Antiviral/IFN	RIG-1 like receptor signaling (M68)	DMSO	Up	2.71E-10	6.36E-09	TRUE
Antiviral/IFN	antiviral IFN signature (M75)	DMSO	Up	1.78E-09	3.41E-08	TRUE
Antiviral/IFN	viral sensing & immunity; IRF2 targets network (II) (M111.1)	DMSO	Up	6.22E-06	5.71E-05	TRUE
Antiviral/IFN	innate activation by cytosolic DNA sensing (M13)	DMSO	Up	2.54E-04	0.001396743	TRUE
Antiviral/IFN	viral sensing & immunity; IRF2 targets network (I) (M111.0)	DMSO	Up	0.050978152	0.131175489	TRUE
B Cells	B cell surface signature (S2)	DMSO	Down	0.002810082	0.011858545	TRUE
B Cells	Memory B cell surface signature (S9)	DMSO	Down	0.008331188	0.028850483	TRUE
B Cells	Naive B cell surface signature (S8)	DMSO	Down	0.048505433	0.131012884	TRUE
B Cells	enriched in B cells (VI) (M69)	DMSO	Up	0.191508987	0.377648564	FALSE
B Cells	enriched in naive and memory B cells (M83)	DMSO	Down	0.229594083	0.425224002	FALSE
B Cells	enriched in B cells (III) (M47.2)	DMSO	Down	0.356710993	0.565909922	FALSE
B Cells	enriched in B cells (IV) (M47.3)	DMSO	Down	0.42212077	0.628966564	FALSE
B Cells	B cell development/activation (M58)	DMSO	Up	0.42617432	0.628966564	FALSE
B Cells	enriched in B cells (I) (M47.0)	DMSO	Up	0.592855533	0.768354339	FALSE
B Cells	B cell development (M9)	DMSO	Up	0.655489555	0.813578213	FALSE
B Cells	enriched in B cells (V) (M47.4)	DMSO	Down	0.693868648	0.843549467	FALSE
B Cells	BCR signaling (M54)	DMSO	Up	0.832858716	0.910534658	FALSE
B Cells	enriched in B cells (II) (M47.1)	DMSO	Up	0.87821784	0.94062926	FALSE
Cell Cycle	cell cycle and transcription (M4.0)	DMSO	Down	8.65E-09	1.30E-07	TRUE
Cell Cycle	cell cycle and growth arrest (M31)	DMSO	Up	2.33E-08	3.27E-07	TRUE
Cell Cycle	enriched in cell cycle (M167)	DMSO	Up	0.005362959	0.020206862	TRUE
Cell Cycle	mitotic cell cycle in stimulated CD4 T cells (M4.5)	DMSO	Up	0.087689317	0.203323582	FALSE
Cell Cycle	cell cycle, ATP binding (M144)	DMSO	Up	0.08890456	0.203900676	FALSE
Cell Cycle	mitotic cell cycle in stimulated CD4 T cells (M4.11)	DMSO	Down	0.164530883	0.337048702	FALSE
Cell Cycle	cell division in stimulated CD4 T cells (M4.6)	DMSO	Up	0.294391237	0.4929885	FALSE
Cell Cycle	mitotic cell cycle - DNA replication (M4.4)	DMSO	Down	0.305706766	0.503938497	FALSE
Cell Cycle	mismatch repair (I) (M22.0)	DMSO	Up	0.319877464	0.519185729	FALSE
Cell Cycle	DNA repair (M76)	DMSO	Up	0.377576984	0.585799586	FALSE
Cell Cycle	mitosis (TF motif CCAATNNSNNNGCG) (M169)	DMSO	Up	0.538949541	0.715209768	FALSE
Cell Cycle	mitotic cell division (M6)	DMSO	Up	0.583643563	0.764899328	FALSE
Cell Cycle	cell cycle, mitotic phase (M230)	DMSO	Up	0.708121966	0.843549467	FALSE
Cell Cycle	mismatch repair (II) (M22.1)	DMSO	Up	0.715617794	0.843549467	FALSE
Cell Cycle	cell cycle (II) (M4.10)	DMSO	Down	0.73252471	0.858681743	FALSE
Cell Cycle	cell cycle (III) (M103)	DMSO	Up	0.79943984	0.900385718	FALSE
Cell Cycle	mitotic cell cycle (M4.7)	DMSO	Up	0.812187718	0.901955835	FALSE
Cell Cycle	mitotic cell cycle in stimulated CD4 T cells (M4.9)	DMSO	Up	0.901126873	0.955466182	FALSE
Cell Cycle	cell division (M37.3)	DMSO	Down	0.914419244	0.95756894	FALSE
Cell Cycle	cell division - E2F transcription network (M4.8)	DMSO	Up	0.924657659	0.95756894	FALSE
Cell Cycle	cell cycle (I) (M4.1)	DMSO	Up	0.963354859	0.972573566	FALSE
Complement	complement activation (I) (M112.0)	DMSO	Down	0.029073069	0.084033116	TRUE
Dendritic Cells	Resting dendritic cell surface signature (S10)	DMSO	Down	6.75E-17	4.75E-15	TRUE
Dendritic Cells	activated dendritic cells (M67)	DMSO	Up	6.21E-10	1.31E-08	TRUE
Dendritic Cells	proinflammatory dendritic cell, myeloid cell response (M86.1)	DMSO	Up	4.42E-09	7.17E-08	TRUE
Dendritic Cells	myeloid, dendritic cell activation via NFkB (I) (M43.0)	DMSO	Up	3.14E-06	3.49E-05	TRUE
Dendritic Cells	complement and other receptors in DCs (M40)	DMSO	Down	4.89E-05	3.82E-04	TRUE
Dendritic Cells	myeloid, dendritic cell activation via NFkB (II) (M43.1)	DMSO	Up	5.13E-05	3.87E-04	TRUE
Dendritic Cells	CD1 and other DC receptors (M50)	DMSO	Down	1.12E-04	7.37E-04	TRUE
Dendritic Cells	enriched in activated dendritic cells (II) (M165)	DMSO	Up	2.36E-04	0.001381102	TRUE
Dendritic Cells	enriched in activated dendritic cells/monocytes (M64)	DMSO	Up	3.41E-04	0.001800409	TRUE
Dendritic Cells	DC surface signature (S5)	DMSO	Down	3.54E-04	0.001819388	TRUE
Dendritic Cells	enriched in dendritic cells (M168)	DMSO	Down	0.001109007	0.005086967	TRUE
Dendritic Cells	Activated (LPS) dendritic cell surface signature (S11)	DMSO	Up	0.018985874	0.058058252	TRUE
Dendritic Cells	enriched in activated dendritic cells (I) (M119)	DMSO	Down	0.430046788	0.628966564	FALSE
ECM and Migration	extracellular matrix, complement (M140)	DMSO	Down	1.86E-06	2.18E-05	TRUE
ECM and Migration	extracellular matrix (II) (M2.1)	DMSO	Down	4.95E-04	0.002470075	TRUE
ECM and Migration	cell junction (GO) (M4.13)	DMSO	Down	0.007562044	0.027510195	TRUE
ECM and Migration	collagen, TGFB family et al (M77)	DMSO	Down	0.013221407	0.044281221	TRUE
ECM and Migration	receptors, cell migration (M109)	DMSO	Down	0.02467133	0.072300703	TRUE
ECM and Migration	integrins and cell adhesion (M84)	DMSO	Down	0.065617787	0.157333557	TRUE
ECM and Migration	integrin mediated leukocyte migration (M39)	DMSO	Down	0.106589595	0.2367411	FALSE
ECM and Migration	cell adhesion (M51)	DMSO	Up	0.171101801	0.347139231	FALSE
ECM and Migration	cytoskeleton/actin (SRF transcription targets) (M145.0)	DMSO	Down	0.197823804	0.382943327	FALSE
ECM and Migration	extracellular region cluster (GO) (M189)	DMSO	Down	0.254697276	0.451606094	FALSE
ECM and Migration	adhesion and migration, chemotaxis (M91)	DMSO	Down	0.304051274	0.503938497	FALSE
ECM and Migration	leukocyte migration (M88.0)	DMSO	Down	0.435209092	0.628966564	FALSE
ECM and Migration	cytoskeleton/actin (SRF transcription targets) (M145.1)	DMSO	Down	0.444757984	0.636277371	FALSE
ECM and Migration	integrin cell surface interactions (I) (M1.0)	DMSO	Down	0.462684799	0.638081651	FALSE
ECM and Migration	cytoskeletal remodeling (enriched for SRF targets) (M34)	DMSO	Up	0.526471761	0.70755122	FALSE
ECM and Migration	cell adhesion (GO) (M117)	DMSO	Up	0.544815314	0.718475196	FALSE
ECM and Migration	cytoskeletal remodeling (M32.8)	DMSO	Up	0.643208398	0.803420525	FALSE
ECM and Migration	leukocyte activation and migration (M45)	DMSO	Up	0.703051787	0.843549467	FALSE
ECM and Migration	cell movement, Adhesion & Platelet activation (M30)	DMSO	Up	0.822256836	0.904577011	FALSE
ECM and Migration	cell adhesion (lymphocyte homing) (M21)	DMSO	Up	0.92580125	0.95756894	FALSE
General Immune	myeloid cell enriched receptors and transporters (M4.3)	DMSO	Down	2.46E-11	7.42E-10	TRUE
General Immune	immune activation - generic cluster (M37.0)	DMSO	Down	1.57E-05	1.28E-04	TRUE
General Immune	leukocyte differentiation (M160)	DMSO	Up	5.78E-04	0.002769436	TRUE
General Immune	immuregulation - monocytes, T and B cells (M57)	DMSO	Up	0.002456837	0.010799844	TRUE
General Immune	CCR1, 7 and cell signaling (M59)	DMSO	Down	0.310720328	0.508232475	FALSE
General Immune	lymphocyte generic cluster (M60)	DMSO	Up	0.423561658	0.628966564	FALSE
General Immune	T & B cell development, activation (M62.0)	DMSO	Down	0.593562831	0.768354339	FALSE
Inflammatory/TLR/chemokines	chemokines and inflammatory molecules in myeloid cells (M86.0)	DMSO	Up	3.98E-16	2.10E-14	TRUE
Inflammatory/TLR/chemokines	cytokines - recepters cluster (M115)	DMSO	Up	4.38E-09	7.17E-08	TRUE
Inflammatory/TLR/chemokines	TLR and inflammatory signaling (M16)	DMSO	Down	6.15E-06	5.71E-05	TRUE
Inflammatory/TLR/chemokines	proinflammatory cytokines and chemokines (M29)	DMSO	Up	1.34E-05	1.13E-04	TRUE
Inflammatory/TLR/chemokines	chemokine cluster (I) (M27.0)	DMSO	Up	8.24E-05	5.99E-04	TRUE
Inflammatory/TLR/chemokines	inflammatory response (M33)	DMSO	Down	1.68E-04	0.001010063	TRUE
Inflammatory/TLR/chemokines	cell activation (IL15, IL23, TNF) (M24)	DMSO	Up	0.003138089	0.012733399	TRUE
Inflammatory/TLR/chemokines	chemokines and receptors (M38)	DMSO	Up	0.007385945	0.027340954	TRUE
Inflammatory/TLR/chemokines	TLR8-BAFF network (M25)	DMSO	Down	0.007970916	0.028506157	TRUE
Inflammatory/TLR/chemokines	MHC-TLR7-TLR8 cluster (M146)	DMSO	Down	0.013993783	0.046135752	TRUE
Inflammatory/TLR/chemokines	inflammasome receptors and signaling (M53)	DMSO	Up	0.043039583	0.119491474	TRUE
Inflammatory/TLR/chemokines	myeloid cell cytokines, metallopeptidases and laminins (M78)	DMSO	Up	0.460058658	0.638081651	FALSE
Inflammatory/TLR/chemokines	chemokine cluster (II) (M27.1)	DMSO	Up	0.641341979	0.803420525	FALSE
Membrane Transport	endoplasmic reticulum (M37.2)	DMSO	Down	0.003503331	0.013688942	TRUE
Membrane Transport	Membrane, ER proteins (M134)	DMSO	Down	0.050294046	0.131012884	TRUE
Membrane Transport	enriched in membrane proteins (M124)	DMSO	Down	0.101751455	0.228399543	FALSE
Membrane Transport	transmembrane transport (I) (M87)	DMSO	Down	0.176779263	0.353207579	FALSE
Membrane Transport	intracellular transport (M147)	DMSO	Up	0.177440775	0.353207579	FALSE
Membrane Transport	transmembrane transport (II) (M191)	DMSO	Up	0.488624833	0.665160256	FALSE
Membrane Transport	golgi membrane (II) (M237)	DMSO	Down	0.614163521	0.785384867	FALSE
Metabolism	lysosomal/endosomal proteins (M139)	DMSO	Down	3.24E-11	8.55E-10	TRUE
Metabolism	lysosome (M209)	DMSO	Down	1.04E-07	1.38E-06	TRUE
Metabolism	glycerophospholipid metabolism (M114.1)	DMSO	Down	0.058717114	0.1457566	TRUE
Metabolism	proteasome (M226)	DMSO	Up	0.12432024	0.262315706	FALSE
Metabolism	heme biosynthesis (I) (M171)	DMSO	Up	0.224241286	0.422454566	FALSE
Metabolism	heme biosynthesis (II) (M222)	DMSO	Up	0.290281389	0.4929885	FALSE
Metabolism	lipid metabolism, endoplasmic reticulum (M92)	DMSO	Down	0.612831832	0.785384867	FALSE
Metabolism	nucleotide metabolism (M181)	DMSO	Down	0.863924219	0.934810309	FALSE
Metabolism	inositol phosphate metabolism (M129)	DMSO	Up	0.874086125	0.94062926	FALSE
Metabolism	purine nucleotide biosynthesis (M212)	DMSO	Down	0.969379244	0.973995336	FALSE
Mitochondria	respiratory electron transport chain (mitochondrion) (M219)	DMSO	Down	0.293088441	0.4929885	FALSE
Mitochondria	mitochondrial cluster (M235)	DMSO	Down	0.678440017	0.837139436	FALSE
Mitochondria	respiratory electron transport chain (mitochondrion) (M238)	DMSO	Down	0.740899713	0.863700771	FALSE
Mitochondria	respiratory electron transport chain (mitochondrion) (M231)	DMSO	Down	0.78851318	0.894496135	FALSE
Mitochondria	respiratory electron transport chain (mitochondrion) (M216)	DMSO	Down	0.81177856	0.901955835	FALSE
Monocytes	enriched in monocytes (II) (M11.0)	DMSO	Down	3.22E-23	6.78E-21	TRUE
Monocytes	Monocyte surface signature (S4)	DMSO	Down	8.35E-12	2.93E-10	TRUE
Monocytes	enriched in monocytes (IV) (M118.0)	DMSO	Down	1.14E-06	1.41E-05	TRUE
Monocytes	enriched in monocytes (surface) (M118.1)	DMSO	Down	2.58E-04	0.001396743	TRUE
Monocytes	enriched in monocytes (I) (M4.15)	DMSO	Down	0.017291454	0.053654366	TRUE
Monocytes	enriched in monocytes (III) (M73)	DMSO	Down	0.038207009	0.107489051	TRUE
Monocytes	enriched in myeloid cells and monocytes (M81)	DMSO	Down	0.063506455	0.155812349	TRUE
Monocytes	RA, WNT, CSF receptors network (monocyte) (M23)	DMSO	Down	0.219674232	0.417578946	FALSE
NA	regulation of localization (GO) (M63)	DMSO	Up	0.002661949	0.011462679	TRUE
NA	erythrocyte differentiation (M173)	DMSO	Up	0.078694133	0.184494023	TRUE
NA	chromosome Y linked (M240)	DMSO	Up	0.261047017	0.459007672	FALSE
NA	enriched for ubiquitination (M138)	DMSO	Up	0.401426754	0.618255803	FALSE
Neutrophils	formyl peptide receptor mediated neutrophil response (M11.2)	DMSO	Down	0.003103394	0.012733399	TRUE
Neutrophils	enriched in neutrophils (II) (M163)	DMSO	Down	0.016682509	0.052537455	TRUE
Neutrophils	enriched in neutrophils (I) (M37.1)	DMSO	Down	0.229741878	0.425224002	FALSE
Neutrophils	recruitment of neutrophils (M132)	DMSO	Down	0.252474719	0.451606094	FALSE
NK Cells	enriched in NK cells (I) (M7.2)	DMSO	Up	1.31E-04	8.40E-04	TRUE
NK Cells	enriched in NK cells (III) (M157)	DMSO	Up	0.049593306	0.131012884	TRUE
NK Cells	NK cell surface signature (S1)	DMSO	Up	0.051631034	0.131254798	TRUE
NK Cells	enriched in NK cells (II) (M61.0)	DMSO	Up	0.196230114	0.382943327	FALSE
NK Cells	enriched in NK cells (receptor activation) (M61.2)	DMSO	Up	0.453384664	0.636277371	FALSE
Nuclear Pore	nuclear pore, transport; mRNA splicing, processing (M143)	DMSO	Up	0.487448264	0.665160256	FALSE
Nuclear Pore	nuclear pore complex (M106.0)	DMSO	Down	0.683494382	0.838472759	FALSE
Nuclear Pore	nuclear pore complex (mitosis) (M106.1)	DMSO	Down	0.95155743	0.965281816	FALSE
Plasma Cells	plasma cells & B cells, immunoglobulins (M156.0)	DMSO	Down	0.033295469	0.09493708	TRUE
Plasma Cells	Plasma cell surface signature (S3)	DMSO	Down	0.069616405	0.165045633	TRUE
Platelets/Coagulation	blood coagulation (M11.1)	DMSO	Down	0.014865051	0.048254242	TRUE
Platelets/Coagulation	platelet activation (II) (M32.1)	DMSO	Up	0.022622944	0.067231566	TRUE
Platelets/Coagulation	platelet activation - actin binding (M196)	DMSO	Up	0.146504518	0.306063894	FALSE
Platelets/Coagulation	platelet activation (I) (M32.0)	DMSO	Up	0.368051926	0.575251529	FALSE
Platelets/Coagulation	platelet activation (III) (M42)	DMSO	Up	0.433459388	0.628966564	FALSE
Platelets/Coagulation	platelet activation and degranulation (M85)	DMSO	Down	0.883666259	0.94168475	FALSE
Signal Transduction	growth factor induced, enriched in nuclear receptor subfamily 4 (M94)	DMSO	Up	4.07E-06	4.09E-05	TRUE
Signal Transduction	regulation of signal transduction (M3)	DMSO	Down	0.010444749	0.03554584	TRUE
Signal Transduction	G protein coupled receptors cluster (M155)	DMSO	Down	0.116271219	0.251191763	FALSE
Signal Transduction	enriched in G-protein coupled receptors (M130)	DMSO	Up	0.340504748	0.548446579	FALSE
Signal Transduction	phosphatidylinositol signaling system (M101)	DMSO	Up	0.413056936	0.627064597	FALSE
Signal Transduction	suppression of MAPK signaling (M56)	DMSO	Down	0.45042226	0.636277371	FALSE
Signal Transduction	small GTPase mediated signal transduction (M215)	DMSO	Up	0.713584299	0.843549467	FALSE
Signal Transduction	MAPK, RAS signaling (M100)	DMSO	Up	0.769511761	0.887251266	FALSE
Signal Transduction	Rho GTPase cycle (M4.14)	DMSO	Up	0.930573214	0.957809503	FALSE
Signal Transduction	PLK1 signaling events (M4.2)	DMSO	Up	0.941490053	0.963486461	FALSE
Signal Transduction	enriched for SMAD2/3 signaling (M97)	DMSO	Down	0.945221315	0.963486461	FALSE
T Cells	signaling in T cells (II) (M35.1)	DMSO	Up	9.82E-06	8.63E-05	TRUE
T Cells	signaling in T cells (I) (M35.0)	DMSO	Up	1.52E-04	9.42E-04	TRUE
T Cells	CORO1A-DEF6 network (II) (M32.4)	DMSO	Up	0.003281404	0.013063703	TRUE
T Cells	CORO1A-DEF6 network (I) (M32.2)	DMSO	Up	0.003632262	0.013934676	TRUE
T Cells	T cell activation and signaling (M5.1)	DMSO	Down	0.021784007	0.065663221	TRUE
T Cells	T cell activation (II) (M7.3)	DMSO	Up	0.053480183	0.134337127	TRUE
T Cells	double positive thymocytes (M126)	DMSO	Down	0.064463936	0.15634357	TRUE
T Cells	T cell surface, activation (M36)	DMSO	Down	0.108082401	0.23755611	FALSE
T Cells	T cell differentiation (Th2) (M19)	DMSO	Down	0.117857746	0.251191763	FALSE
T Cells	enriched in T cells (I) (M7.0)	DMSO	Up	0.2001014	0.383830867	FALSE
T Cells	cell division (stimulated CD4+ T cells) (M46)	DMSO	Down	0.249309015	0.451606094	FALSE
T Cells	CD28 costimulation (M12)	DMSO	Down	0.274317096	0.476613491	FALSE
T Cells	T cell surface signature (S0)	DMSO	Up	0.275577469	0.476613491	FALSE
T Cells	T cell differentiation (M14)	DMSO	Down	0.281506096	0.482908831	FALSE
T Cells	T cell signaling and costimulation (M44)	DMSO	Down	0.360542419	0.567719779	FALSE
T Cells	T cell activation (IV) (M52)	DMSO	Up	0.429847461	0.628966564	FALSE
T Cells	IL2, IL7, TCR network (M65)	DMSO	Up	0.446652674	0.636277371	FALSE
T Cells	T cell differentiation via ITK and PKC (M18)	DMSO	Up	0.530417961	0.708342974	FALSE
T Cells	enriched in T cells (II) (M223)	DMSO	Down	0.617995444	0.785524329	FALSE
T Cells	CD4 T cell surface signature Th2-stimulated (S7)	DMSO	Down	0.767581623	0.887251266	FALSE
T Cells	T cell activation (I) (M7.1)	DMSO	Up	0.775082777	0.88881775	FALSE
T Cells	T cell activation (III) (M7.4)	DMSO	Down	0.823122209	0.904577011	FALSE
Transcription	putative targets of PAX3 (M89.1)	DMSO	Up	8.95E-05	6.09E-04	TRUE
Transcription	putative targets of PAX3 (M89.0)	DMSO	Up	2.46E-04	0.001396743	TRUE
Transcription	regulation of transcription, transcription factors (M213)	DMSO	Up	7.63E-04	0.003576622	TRUE
Transcription	KLF12 targets network (M32.3)	DMSO	Up	0.049346773	0.131012884	TRUE
Transcription	enriched for TF motif PAX3 (M179)	DMSO	Up	0.050292049	0.131012884	TRUE
Transcription	enriched for TF motif TTCNRGNNNNTTC (M172)	DMSO	Up	0.100851975	0.228399543	FALSE
Transcription	AP-1 transcription factor network (M20)	DMSO	Up	0.117310089	0.251191763	FALSE
Transcription	E2F transcription factor network (M8)	DMSO	Down	0.25107605	0.451606094	FALSE
Transcription	targets of FOSL1/2 (M0)	DMSO	Up	0.253137446	0.451606094	FALSE
Transcription	transcriptional targets of glucocorticoid receptor (M74)	DMSO	Up	0.413089947	0.627064597	FALSE
Transcription	transcription regulation in cell development (M49)	DMSO	Down	0.455345417	0.636277371	FALSE
Transcription	enriched in DNA interacting proteins (M182)	DMSO	Down	0.502985397	0.680319992	FALSE
Transcription	transcription elongation, RNA polymerase II (M234)	DMSO	Up	0.643497956	0.803420525	FALSE
Transcription	enriched for TF motif TNCATNTCCYR (M232)	DMSO	Down	0.698856096	0.843549467	FALSE
Transcription	spliceosome (M250)	DMSO	Up	0.715262885	0.843549467	FALSE
Transcription	E2F1 targets (Q4) (M10.1)	DMSO	Down	0.78264323	0.892636332	FALSE
Transcription	enriched for promoter motif NATCACGTGAY (putative SREBF1 targets) (M178)	DMSO	Up	0.907654477	0.95756894	FALSE
Transcription	C-MYC transcriptional network (M4.12)	DMSO	Up	0.92527311	0.95756894	FALSE
Transcription	E2F1 targets (Q3) (M10.0)	DMSO	Up	0.983717957	0.983717957	FALSE
Translation	translation initiation factor 3 complex (M245)	DMSO	Down	0.158294886	0.327453146	FALSE
Translation	translation initiation (M227)	DMSO	Up	0.353296924	0.56473978	FALSE
Translation	chaperonin mediated protein folding (II) (M204.1)	DMSO	Down	0.802239407	0.900385718	FALSE
Translation	chaperonin mediated protein folding (I) (M204.0)	DMSO	Up	0.838273427	0.911730377	FALSE
Antigen Presentation	enriched in antigen presentation (II) (M95.0)	HBS	Up	4.05E-04	0.020033276	TRUE
Antigen Presentation	antigen processing and presentation (M200)	HBS	Up	0.00506913	0.066849146	TRUE
Antigen Presentation	enriched in antigen presentation (III) (M95.1)	HBS	Up	0.023088804	0.116997816	TRUE
Antigen Presentation	regulation of antigen presentation and immune response (M5.0)	HBS	Up	0.170234087	0.348302672	FALSE
Antigen Presentation	enriched in antigen presentation (I) (M71)	HBS	Up	0.177093219	0.348302672	FALSE
Antigen Presentation	antigen presentation (lipids and proteins) (M28)	HBS	Up	0.599776449	0.71097096	FALSE
Antiviral/IFN	antiviral IFN signature (M75)	HBS	Down	0.010574542	0.076938911	TRUE
Antiviral/IFN	innate antiviral response (M150)	HBS	Down	0.07290196	0.235689331	FALSE
Antiviral/IFN	viral sensing & immunity; IRF2 targets network (I) (M111.0)	HBS	Down	0.073025551	0.235689331	FALSE
Antiviral/IFN	RIG-1 like receptor signaling (M68)	HBS	Down	0.139364591	0.31962966	FALSE
Antiviral/IFN	type I interferon response (M127)	HBS	Down	0.174107142	0.348302672	FALSE
Antiviral/IFN	innate activation by cytosolic DNA sensing (M13)	HBS	Down	0.175623891	0.348302672	FALSE
Antiviral/IFN	viral sensing & immunity; IRF2 targets network (II) (M111.1)	HBS	Down	0.928250722	0.964832031	FALSE
B Cells	enriched in naive and memory B cells (M83)	HBS	Up	0.005494176	0.067356605	TRUE
B Cells	enriched in B cells (I) (M47.0)	HBS	Up	0.006938207	0.069712461	TRUE
B Cells	enriched in B cells (II) (M47.1)	HBS	Up	0.024866539	0.119246357	TRUE
B Cells	enriched in B cells (VI) (M69)	HBS	Up	0.050219541	0.192660421	TRUE
B Cells	Naive B cell surface signature (S8)	HBS	Down	0.133198728	0.319374222	FALSE
B Cells	enriched in B cells (V) (M47.4)	HBS	Up	0.136789664	0.31962966	FALSE
B Cells	enriched in B cells (III) (M47.2)	HBS	Up	0.176018774	0.348302672	FALSE
B Cells	BCR signaling (M54)	HBS	Down	0.260787659	0.436715842	FALSE
B Cells	Memory B cell surface signature (S9)	HBS	Up	0.501931215	0.653749915	FALSE
B Cells	B cell development (M9)	HBS	Up	0.624296174	0.731813849	FALSE
B Cells	B cell surface signature (S2)	HBS	Down	0.815653349	0.873618562	FALSE
B Cells	B cell development/activation (M58)	HBS	Up	0.947751521	0.979302697	FALSE
B Cells	enriched in B cells (IV) (M47.3)	HBS	Up	0.973048978	0.982398579	FALSE
Cell Cycle	cell cycle and transcription (M4.0)	HBS	Down	0.00870399	0.074677241	TRUE
Cell Cycle	cell division (M37.3)	HBS	Up	0.028117565	0.126229918	TRUE
Cell Cycle	mitosis (TF motif CCAATNNSNNNGCG) (M169)	HBS	Up	0.075768937	0.235689331	FALSE
Cell Cycle	cell cycle and growth arrest (M31)	HBS	Down	0.076061816	0.235689331	FALSE
Cell Cycle	cell cycle (III) (M103)	HBS	Up	0.117346274	0.30487269	FALSE
Cell Cycle	cell cycle (II) (M4.10)	HBS	Down	0.167458756	0.348302672	FALSE
Cell Cycle	mitotic cell cycle (M4.7)	HBS	Down	0.182664059	0.3535974	FALSE
Cell Cycle	cell cycle, mitotic phase (M230)	HBS	Up	0.204971886	0.376078852	FALSE
Cell Cycle	cell division in stimulated CD4 T cells (M4.6)	HBS	Down	0.279155258	0.449631752	FALSE
Cell Cycle	mismatch repair (I) (M22.0)	HBS	Up	0.372486407	0.556484667	FALSE
Cell Cycle	mismatch repair (II) (M22.1)	HBS	Up	0.392669811	0.56021592	FALSE
Cell Cycle	cell division - E2F transcription network (M4.8)	HBS	Up	0.427398455	0.599258487	FALSE
Cell Cycle	mitotic cell cycle in stimulated CD4 T cells (M4.9)	HBS	Up	0.436796681	0.606342762	FALSE
Cell Cycle	cell cycle, ATP binding (M144)	HBS	Up	0.506346477	0.653940099	FALSE
Cell Cycle	mitotic cell cycle in stimulated CD4 T cells (M4.5)	HBS	Down	0.511022782	0.653940099	FALSE
Cell Cycle	DNA repair (M76)	HBS	Up	0.516507837	0.653940099	FALSE
Cell Cycle	cell cycle (I) (M4.1)	HBS	Down	0.52094457	0.654281573	FALSE
Cell Cycle	mitotic cell cycle - DNA replication (M4.4)	HBS	Up	0.544064535	0.672743205	FALSE
Cell Cycle	mitotic cell division (M6)	HBS	Up	0.591692764	0.710203713	FALSE
Cell Cycle	mitotic cell cycle in stimulated CD4 T cells (M4.11)	HBS	Down	0.688405169	0.786482777	FALSE
Cell Cycle	enriched in cell cycle (M167)	HBS	Up	0.986711147	0.986711147	FALSE
Complement	complement activation (I) (M112.0)	HBS	Down	0.014129643	0.093167337	TRUE
Dendritic Cells	enriched in activated dendritic cells/monocytes (M64)	HBS	Down	0.00610095	0.06775266	TRUE
Dendritic Cells	DC surface signature (S5)	HBS	Down	0.007275219	0.069775961	TRUE
Dendritic Cells	enriched in activated dendritic cells (II) (M165)	HBS	Down	0.009916868	0.076046421	TRUE
Dendritic Cells	CD1 and other DC receptors (M50)	HBS	Down	0.010091468	0.076046421	TRUE
Dendritic Cells	Activated (LPS) dendritic cell surface signature (S11)	HBS	Down	0.021890789	0.116997816	TRUE
Dendritic Cells	enriched in dendritic cells (M168)	HBS	Down	0.120363284	0.30525605	FALSE
Dendritic Cells	Resting dendritic cell surface signature (S10)	HBS	Down	0.121711005	0.30525605	FALSE
Dendritic Cells	enriched in activated dendritic cells (I) (M119)	HBS	Down	0.155284549	0.342933578	FALSE
Dendritic Cells	myeloid, dendritic cell activation via NFkB (II) (M43.1)	HBS	Down	0.197677298	0.369114247	FALSE
Dendritic Cells	activated dendritic cells (M67)	HBS	Down	0.203910043	0.376078852	FALSE
Dendritic Cells	complement and other receptors in DCs (M40)	HBS	Down	0.256025196	0.434997645	FALSE
Dendritic Cells	proinflammatory dendritic cell, myeloid cell response (M86.1)	HBS	Down	0.306588295	0.47918615	FALSE
Dendritic Cells	myeloid, dendritic cell activation via NFkB (I) (M43.0)	HBS	Down	0.42885323	0.599258487	FALSE
ECM and Migration	integrin mediated leukocyte migration (M39)	HBS	Up	0.010013234	0.076046421	TRUE
ECM and Migration	adhesion and migration, chemotaxis (M91)	HBS	Down	0.023843157	0.116997816	TRUE
ECM and Migration	receptors, cell migration (M109)	HBS	Up	0.054495882	0.19825226	TRUE
ECM and Migration	cell junction (GO) (M4.13)	HBS	Down	0.088881869	0.250054324	FALSE
ECM and Migration	cell movement, Adhesion & Platelet activation (M30)	HBS	Down	0.135262055	0.31962966	FALSE
ECM and Migration	cytoskeletal remodeling (M32.8)	HBS	Up	0.150905565	0.342377142	FALSE
ECM and Migration	extracellular matrix (II) (M2.1)	HBS	Down	0.16332613	0.348302672	FALSE
ECM and Migration	leukocyte migration (M88.0)	HBS	Down	0.16855126	0.348302672	FALSE
ECM and Migration	extracellular region cluster (GO) (M189)	HBS	Down	0.196000044	0.369114247	FALSE
ECM and Migration	cell adhesion (lymphocyte homing) (M21)	HBS	Down	0.48650069	0.640517219	FALSE
ECM and Migration	cell adhesion (M51)	HBS	Down	0.517573443	0.653940099	FALSE
ECM and Migration	integrin cell surface interactions (I) (M1.0)	HBS	Down	0.540547784	0.672743205	FALSE
ECM and Migration	cytoskeleton/actin (SRF transcription targets) (M145.0)	HBS	Up	0.545208948	0.672743205	FALSE
ECM and Migration	leukocyte activation and migration (M45)	HBS	Up	0.564025839	0.687915907	FALSE
ECM and Migration	extracellular matrix, complement (M140)	HBS	Down	0.616833616	0.727105547	FALSE
ECM and Migration	cell adhesion (GO) (M117)	HBS	Up	0.708123189	0.799005309	FALSE
ECM and Migration	cytoskeletal remodeling (enriched for SRF targets) (M34)	HBS	Down	0.757159007	0.8320862	FALSE
ECM and Migration	cytoskeleton/actin (SRF transcription targets) (M145.1)	HBS	Down	0.765413045	0.834345157	FALSE
ECM and Migration	integrins and cell adhesion (M84)	HBS	Down	0.956096472	0.979302697	FALSE
ECM and Migration	collagen, TGFB family et al (M77)	HBS	Down	0.977742661	0.982398579	FALSE
General Immune	CCR1, 7 and cell signaling (M59)	HBS	Up	0.068284115	0.235689331	FALSE
General Immune	immuregulation - monocytes, T and B cells (M57)	HBS	Up	0.078617124	0.235689331	FALSE
General Immune	myeloid cell enriched receptors and transporters (M4.3)	HBS	Down	0.111079091	0.292971102	FALSE
General Immune	leukocyte differentiation (M160)	HBS	Up	0.312195846	0.484362672	FALSE
General Immune	lymphocyte generic cluster (M60)	HBS	Up	0.59239741	0.710203713	FALSE
General Immune	immune activation - generic cluster (M37.0)	HBS	Down	0.693145217	0.786482777	FALSE
General Immune	T & B cell development, activation (M62.0)	HBS	Down	0.95607295	0.979302697	FALSE
Inflammatory/TLR/chemokines	TLR and inflammatory signaling (M16)	HBS	Down	0.001273395	0.026868639	TRUE
Inflammatory/TLR/chemokines	chemokine cluster (II) (M27.1)	HBS	Down	0.022778286	0.116997816	TRUE
Inflammatory/TLR/chemokines	chemokines and receptors (M38)	HBS	Down	0.023766718	0.116997816	TRUE
Inflammatory/TLR/chemokines	chemokines and inflammatory molecules in myeloid cells (M86.0)	HBS	Down	0.035787894	0.151024913	TRUE
Inflammatory/TLR/chemokines	proinflammatory cytokines and chemokines (M29)	HBS	Down	0.076226642	0.235689331	FALSE
Inflammatory/TLR/chemokines	MHC-TLR7-TLR8 cluster (M146)	HBS	Up	0.209134334	0.37715679	FALSE
Inflammatory/TLR/chemokines	myeloid cell cytokines, metallopeptidases and laminins (M78)	HBS	Down	0.24496853	0.42367508	FALSE
Inflammatory/TLR/chemokines	chemokine cluster (I) (M27.0)	HBS	Down	0.275367934	0.446943339	FALSE
Inflammatory/TLR/chemokines	inflammatory response (M33)	HBS	Down	0.385914706	0.56021592	FALSE
Inflammatory/TLR/chemokines	inflammasome receptors and signaling (M53)	HBS	Down	0.484231241	0.640517219	FALSE
Inflammatory/TLR/chemokines	cytokines - recepters cluster (M115)	HBS	Up	0.488735887	0.640517219	FALSE
Inflammatory/TLR/chemokines	cell activation (IL15, IL23, TNF) (M24)	HBS	Down	0.517447394	0.653940099	FALSE
Inflammatory/TLR/chemokines	TLR8-BAFF network (M25)	HBS	Up	0.851803212	0.907729685	FALSE
Membrane Transport	transmembrane transport (I) (M87)	HBS	Down	0.002003616	0.035230253	TRUE
Membrane Transport	Membrane, ER proteins (M134)	HBS	Down	0.016317419	0.101263984	TRUE
Membrane Transport	intracellular transport (M147)	HBS	Up	0.073256374	0.235689331	FALSE
Membrane Transport	golgi membrane (II) (M237)	HBS	Up	0.11848133	0.30487269	FALSE
Membrane Transport	endoplasmic reticulum (M37.2)	HBS	Down	0.174158935	0.348302672	FALSE
Membrane Transport	enriched in membrane proteins (M124)	HBS	Down	0.251022569	0.430615952	FALSE
Membrane Transport	transmembrane transport (II) (M191)	HBS	Up	0.306000019	0.47918615	FALSE
Metabolism	proteasome (M226)	HBS	Up	0.034183552	0.14719856	TRUE
Metabolism	lysosome (M209)	HBS	Down	0.045899097	0.186244411	TRUE
Metabolism	lysosomal/endosomal proteins (M139)	HBS	Down	0.081031547	0.235689331	FALSE
Metabolism	heme biosynthesis (I) (M171)	HBS	Down	0.15323651	0.342933578	FALSE
Metabolism	heme biosynthesis (II) (M222)	HBS	Down	0.299680644	0.475433203	FALSE
Metabolism	purine nucleotide biosynthesis (M212)	HBS	Up	0.36718504	0.55434889	FALSE
Metabolism	inositol phosphate metabolism (M129)	HBS	Up	0.401341533	0.568342708	FALSE
Metabolism	glycerophospholipid metabolism (M114.1)	HBS	Down	0.630898673	0.735467514	FALSE
Metabolism	lipid metabolism, endoplasmic reticulum (M92)	HBS	Down	0.744160147	0.822082676	FALSE
Metabolism	nucleotide metabolism (M181)	HBS	Down	0.772481072	0.835864134	FALSE
Mitochondria	respiratory electron transport chain (mitochondrion) (M219)	HBS	Up	0.017879882	0.104795975	TRUE
Mitochondria	respiratory electron transport chain (mitochondrion) (M216)	HBS	Up	0.037020525	0.153163347	TRUE
Mitochondria	respiratory electron transport chain (mitochondrion) (M238)	HBS	Up	0.077372455	0.235689331	FALSE
Mitochondria	respiratory electron transport chain (mitochondrion) (M231)	HBS	Up	0.138738737	0.31962966	FALSE
Mitochondria	mitochondrial cluster (M235)	HBS	Up	0.238632882	0.416128414	FALSE
Monocytes	enriched in monocytes (II) (M11.0)	HBS	Down	0.001231529	0.026868639	TRUE
Monocytes	enriched in monocytes (I) (M4.15)	HBS	Down	0.008848014	0.074677241	TRUE
Monocytes	Monocyte surface signature (S4)	HBS	Down	0.061100979	0.21851367	FALSE
Monocytes	enriched in myeloid cells and monocytes (M81)	HBS	Down	0.232807655	0.409353459	FALSE
Monocytes	enriched in monocytes (IV) (M118.0)	HBS	Down	0.273892832	0.446943339	FALSE
Monocytes	enriched in monocytes (surface) (M118.1)	HBS	Down	0.315990625	0.486671692	FALSE
Monocytes	RA, WNT, CSF receptors network (monocyte) (M23)	HBS	Down	0.348554867	0.532935341	FALSE
Monocytes	enriched in monocytes (III) (M73)	HBS	Down	0.738653335	0.822082676	FALSE
NA	enriched for ubiquitination (M138)	HBS	Up	0.006699666	0.069712461	TRUE
NA	chromosome Y linked (M240)	HBS	Down	0.214438511	0.380222906	FALSE
NA	regulation of localization (GO) (M63)	HBS	Down	0.257700026	0.434997645	FALSE
NA	erythrocyte differentiation (M173)	HBS	Down	0.291854104	0.466524363	FALSE
Neutrophils	recruitment of neutrophils (M132)	HBS	Down	1.68E-04	0.01178892	TRUE
Neutrophils	enriched in neutrophils (I) (M37.1)	HBS	Down	0.001629201	0.031251038	TRUE
Neutrophils	formyl peptide receptor mediated neutrophil response (M11.2)	HBS	Down	0.019206158	0.109527011	TRUE
Neutrophils	enriched in neutrophils (II) (M163)	HBS	Down	0.585865045	0.710203713	FALSE
NK Cells	enriched in NK cells (III) (M157)	HBS	Up	0.049092097	0.191822824	TRUE
NK Cells	enriched in NK cells (I) (M7.2)	HBS	Up	0.122970446	0.30525605	FALSE
NK Cells	enriched in NK cells (receptor activation) (M61.2)	HBS	Up	0.178278145	0.348302672	FALSE
NK Cells	NK cell surface signature (S1)	HBS	Down	0.447141625	0.612642097	FALSE
NK Cells	enriched in NK cells (II) (M61.0)	HBS	Down	0.887935017	0.932110888	FALSE
Nuclear Pore	nuclear pore, transport; mRNA splicing, processing (M143)	HBS	Up	1.01E-04	0.010607738	TRUE
Nuclear Pore	nuclear pore complex (M106.0)	HBS	Up	0.005746061	0.067356605	TRUE
Nuclear Pore	nuclear pore complex (mitosis) (M106.1)	HBS	Up	0.020697217	0.114924021	TRUE
Plasma Cells	plasma cells & B cells, immunoglobulins (M156.0)	HBS	Up	0.081541807	0.235689331	FALSE
Plasma Cells	Plasma cell surface signature (S3)	HBS	Down	0.644495336	0.747189648	FALSE
Platelets/Coagulation	platelet activation (III) (M42)	HBS	Down	0.052313231	0.193650733	TRUE
Platelets/Coagulation	platelet activation - actin binding (M196)	HBS	Down	0.070335812	0.235689331	FALSE
Platelets/Coagulation	platelet activation and degranulation (M85)	HBS	Down	0.079506858	0.235689331	FALSE
Platelets/Coagulation	blood coagulation (M11.1)	HBS	Down	0.457259727	0.621173101	FALSE
Platelets/Coagulation	platelet activation (I) (M32.0)	HBS	Up	0.885732131	0.932110888	FALSE
Platelets/Coagulation	platelet activation (II) (M32.1)	HBS	Down	0.974690678	0.982398579	FALSE
Signal Transduction	regulation of signal transduction (M3)	HBS	Down	0.002960332	0.044616434	TRUE
Signal Transduction	suppression of MAPK signaling (M56)	HBS	Down	0.011050416	0.07772126	TRUE
Signal Transduction	G protein coupled receptors cluster (M155)	HBS	Down	0.048406203	0.191822824	TRUE
Signal Transduction	Rho GTPase cycle (M4.14)	HBS	Down	0.092945175	0.258045158	FALSE
Signal Transduction	small GTPase mediated signal transduction (M215)	HBS	Up	0.09765968	0.26761289	FALSE
Signal Transduction	PLK1 signaling events (M4.2)	HBS	Down	0.36781443	0.55434889	FALSE
Signal Transduction	phosphatidylinositol signaling system (M101)	HBS	Up	0.459255942	0.621173101	FALSE
Signal Transduction	enriched in G-protein coupled receptors (M130)	HBS	Up	0.558697888	0.685379386	FALSE
Signal Transduction	enriched for SMAD2/3 signaling (M97)	HBS	Down	0.74260919	0.822082676	FALSE
Signal Transduction	MAPK, RAS signaling (M100)	HBS	Up	0.876783813	0.929655199	FALSE
Signal Transduction	growth factor induced, enriched in nuclear receptor subfamily 4 (M94)	HBS	Up	0.977304935	0.982398579	FALSE
T Cells	enriched in T cells (I) (M7.0)	HBS	Up	6.93E-05	0.010607738	TRUE
T Cells	T cell activation (I) (M7.1)	HBS	Up	4.75E-04	0.020033276	TRUE
T Cells	T cell differentiation (M14)	HBS	Up	7.51E-04	0.024417566	TRUE
T Cells	T cell activation and signaling (M5.1)	HBS	Up	8.10E-04	0.024417566	TRUE
T Cells	T cell surface signature (S0)	HBS	Up	9.37E-04	0.02472484	TRUE
T Cells	T cell differentiation (Th2) (M19)	HBS	Up	0.002883105	0.044616434	TRUE
T Cells	T cell differentiation via ITK and PKC (M18)	HBS	Up	0.008276633	0.074677241	TRUE
T Cells	CD4 T cell surface signature Th2-stimulated (S7)	HBS	Up	0.014095605	0.093167337	TRUE
T Cells	T cell activation (III) (M7.4)	HBS	Up	0.016163356	0.101263984	TRUE
T Cells	enriched in T cells (II) (M223)	HBS	Up	0.026317145	0.12339817	TRUE
T Cells	T cell surface, activation (M36)	HBS	Down	0.099770406	0.269891739	FALSE
T Cells	T cell activation (II) (M7.3)	HBS	Up	0.126198126	0.309625636	FALSE
T Cells	CORO1A-DEF6 network (I) (M32.2)	HBS	Down	0.156026652	0.342933578	FALSE
T Cells	IL2, IL7, TCR network (M65)	HBS	Up	0.171806458	0.348302672	FALSE
T Cells	CORO1A-DEF6 network (II) (M32.4)	HBS	Down	0.186826675	0.35836753	FALSE
T Cells	T cell signaling and costimulation (M44)	HBS	Up	0.266100824	0.442104519	FALSE
T Cells	signaling in T cells (II) (M35.1)	HBS	Up	0.383420889	0.56021592	FALSE
T Cells	cell division (stimulated CD4+ T cells) (M46)	HBS	Down	0.388198379	0.56021592	FALSE
T Cells	T cell activation (IV) (M52)	HBS	Up	0.392947659	0.56021592	FALSE
T Cells	signaling in T cells (I) (M35.0)	HBS	Up	0.596218994	0.710746937	FALSE
T Cells	CD28 costimulation (M12)	HBS	Down	0.693297614	0.786482777	FALSE
T Cells	double positive thymocytes (M126)	HBS	Up	0.780597529	0.840337136	FALSE
Transcription	enriched in DNA interacting proteins (M182)	HBS	Up	0.02696478	0.123686275	TRUE
Transcription	transcription regulation in cell development (M49)	HBS	Down	0.065132993	0.229051026	FALSE
Transcription	enriched for promoter motif NATCACGTGAY (putative SREBF1 targets) (M178)	HBS	Up	0.084727596	0.241588146	FALSE
Transcription	regulation of transcription, transcription factors (M213)	HBS	Up	0.103577262	0.276643067	FALSE
Transcription	spliceosome (M250)	HBS	Up	0.130849639	0.317347975	FALSE
Transcription	E2F transcription factor network (M8)	HBS	Down	0.158059957	0.343821143	FALSE
Transcription	enriched for TF motif PAX3 (M179)	HBS	Up	0.197318038	0.369114247	FALSE
Transcription	C-MYC transcriptional network (M4.12)	HBS	Up	0.208989155	0.37715679	FALSE
Transcription	enriched for TF motif TTCNRGNNNNTTC (M172)	HBS	Up	0.212185796	0.379416974	FALSE
Transcription	enriched for TF motif TNCATNTCCYR (M232)	HBS	Up	0.272033489	0.446943339	FALSE
Transcription	putative targets of PAX3 (M89.1)	HBS	Up	0.374506269	0.556484667	FALSE
Transcription	transcription elongation, RNA polymerase II (M234)	HBS	Up	0.384388452	0.56021592	FALSE
Transcription	KLF12 targets network (M32.3)	HBS	Down	0.442034808	0.609603559	FALSE
Transcription	targets of FOSL1/2 (M0)	HBS	Down	0.466883773	0.627468001	FALSE
Transcription	E2F1 targets (Q3) (M10.0)	HBS	Up	0.474774338	0.634034085	FALSE
Transcription	transcriptional targets of glucocorticoid receptor (M74)	HBS	Down	0.688456325	0.786482777	FALSE
Transcription	AP-1 transcription factor network (M20)	HBS	Down	0.736203819	0.822082676	FALSE
Transcription	putative targets of PAX3 (M89.0)	HBS	Up	0.767123035	0.834345157	FALSE
Transcription	E2F1 targets (Q4) (M10.1)	HBS	Down	0.894930899	0.934804058	FALSE
Translation	translation initiation factor 3 complex (M245)	HBS	Up	0.004488467	0.063137773	TRUE
Translation	chaperonin mediated protein folding (I) (M204.0)	HBS	Up	0.017857861	0.104795975	TRUE
Translation	chaperonin mediated protein folding (II) (M204.1)	HBS	Up	0.032169953	0.141413751	TRUE
Translation	translation initiation (M227)	HBS	Up	0.05119761	0.192905279	TRUE
Antigen Presentation	enriched in antigen presentation (III) (M95.1)	CSP	Up	0.035018872	0.388893788	FALSE
Antigen Presentation	enriched in antigen presentation (II) (M95.0)	CSP	Up	0.040424563	0.426479136	FALSE
Antigen Presentation	antigen processing and presentation (M200)	CSP	Up	0.1653467	0.618138385	FALSE
Antigen Presentation	enriched in antigen presentation (I) (M71)	CSP	Up	0.216538641	0.681939685	FALSE
Antigen Presentation	regulation of antigen presentation and immune response (M5.0)	CSP	Up	0.262335644	0.709651549	FALSE
Antigen Presentation	antigen presentation (lipids and proteins) (M28)	CSP	Up	0.81637727	0.93524154	FALSE
Antiviral/IFN	viral sensing & immunity; IRF2 targets network (I) (M111.0)	CSP	Down	0.078456989	0.5340137	FALSE
Antiviral/IFN	innate antiviral response (M150)	CSP	Down	0.176524129	0.618376637	FALSE
Antiviral/IFN	antiviral IFN signature (M75)	CSP	Down	0.227641169	0.686175524	FALSE
Antiviral/IFN	type I interferon response (M127)	CSP	Down	0.473611141	0.844624237	FALSE
Antiviral/IFN	innate activation by cytosolic DNA sensing (M13)	CSP	Down	0.556628003	0.877027559	FALSE
Antiviral/IFN	RIG-1 like receptor signaling (M68)	CSP	Down	0.569763323	0.877518694	FALSE
Antiviral/IFN	viral sensing & immunity; IRF2 targets network (II) (M111.1)	CSP	Up	0.920174998	0.970784623	FALSE
B Cells	enriched in B cells (I) (M47.0)	CSP	Up	0.057746195	0.499536668	FALSE
B Cells	B cell development (M9)	CSP	Up	0.066563239	0.520179384	FALSE
B Cells	enriched in B cells (II) (M47.1)	CSP	Up	0.083095831	0.538054236	FALSE
B Cells	Naive B cell surface signature (S8)	CSP	Down	0.19600976	0.665909175	FALSE
B Cells	enriched in B cells (V) (M47.4)	CSP	Up	0.241228198	0.697248628	FALSE
B Cells	B cell development/activation (M58)	CSP	Up	0.258905439	0.709468151	FALSE
B Cells	enriched in B cells (III) (M47.2)	CSP	Up	0.407438631	0.819286041	FALSE
B Cells	enriched in naive and memory B cells (M83)	CSP	Up	0.430475614	0.829604058	FALSE
B Cells	enriched in B cells (VI) (M69)	CSP	Up	0.555055089	0.877027559	FALSE
B Cells	B cell surface signature (S2)	CSP	Down	0.587609601	0.879330679	FALSE
B Cells	BCR signaling (M54)	CSP	Up	0.845454126	0.938899056	FALSE
B Cells	enriched in B cells (IV) (M47.3)	CSP	Up	0.973480681	0.993533539	FALSE
B Cells	Memory B cell surface signature (S9)	CSP	Up	0.988824849	0.993533539	FALSE
Cell Cycle	cell division (M37.3)	CSP	Up	0.003050648	0.107281115	TRUE
Cell Cycle	cell cycle (II) (M4.10)	CSP	Down	0.00780367	0.182952716	TRUE
Cell Cycle	cell cycle, ATP binding (M144)	CSP	Up	0.085200999	0.538054236	FALSE
Cell Cycle	mitotic cell cycle in stimulated CD4 T cells (M4.5)	CSP	Down	0.096227415	0.538054236	FALSE
Cell Cycle	cell cycle (I) (M4.1)	CSP	Down	0.134108877	0.613189347	FALSE
Cell Cycle	cell division in stimulated CD4 T cells (M4.6)	CSP	Down	0.198825962	0.665909175	FALSE
Cell Cycle	cell cycle and transcription (M4.0)	CSP	Down	0.244666644	0.697630567	FALSE
Cell Cycle	mismatch repair (I) (M22.0)	CSP	Up	0.333136638	0.775002323	FALSE
Cell Cycle	cell cycle (III) (M103)	CSP	Up	0.337915705	0.775002323	FALSE
Cell Cycle	mitosis (TF motif CCAATNNSNNNGCG) (M169)	CSP	Up	0.446115955	0.840166446	FALSE
Cell Cycle	mitotic cell cycle in stimulated CD4 T cells (M4.11)	CSP	Down	0.516360646	0.877027559	FALSE
Cell Cycle	mitotic cell cycle (M4.7)	CSP	Down	0.607440854	0.891570607	FALSE
Cell Cycle	enriched in cell cycle (M167)	CSP	Up	0.645527458	0.910818913	FALSE
Cell Cycle	mismatch repair (II) (M22.1)	CSP	Up	0.706479561	0.910818913	FALSE
Cell Cycle	cell cycle, mitotic phase (M230)	CSP	Up	0.724818905	0.910818913	FALSE
Cell Cycle	cell division - E2F transcription network (M4.8)	CSP	Up	0.734966654	0.910818913	FALSE
Cell Cycle	DNA repair (M76)	CSP	Down	0.74962492	0.910818913	FALSE
Cell Cycle	cell cycle and growth arrest (M31)	CSP	Up	0.760609686	0.910818913	FALSE
Cell Cycle	mitotic cell division (M6)	CSP	Down	0.835045467	0.938899056	FALSE
Cell Cycle	mitotic cell cycle - DNA replication (M4.4)	CSP	Up	0.882230496	0.963985886	FALSE
Cell Cycle	mitotic cell cycle in stimulated CD4 T cells (M4.9)	CSP	Down	0.905390332	0.964835152	FALSE
Complement	complement activation (I) (M112.0)	CSP	Down	0.161999358	0.618138385	FALSE
Dendritic Cells	enriched in activated dendritic cells (I) (M119)	CSP	Up	0.304074989	0.729088894	FALSE
Dendritic Cells	DC surface signature (S5)	CSP	Up	0.384653997	0.816961151	FALSE
Dendritic Cells	proinflammatory dendritic cell, myeloid cell response (M86.1)	CSP	Up	0.431190316	0.829604058	FALSE
Dendritic Cells	enriched in dendritic cells (M168)	CSP	Up	0.46867141	0.844624237	FALSE
Dendritic Cells	Resting dendritic cell surface signature (S10)	CSP	Up	0.470022813	0.844624237	FALSE
Dendritic Cells	enriched in activated dendritic cells (II) (M165)	CSP	Down	0.476352058	0.844624237	FALSE
Dendritic Cells	enriched in activated dendritic cells/monocytes (M64)	CSP	Up	0.515781609	0.877027559	FALSE
Dendritic Cells	activated dendritic cells (M67)	CSP	Down	0.539804649	0.877027559	FALSE
Dendritic Cells	myeloid, dendritic cell activation via NFkB (I) (M43.0)	CSP	Up	0.542755911	0.877027559	FALSE
Dendritic Cells	CD1 and other DC receptors (M50)	CSP	Down	0.603450316	0.891570607	FALSE
Dendritic Cells	myeloid, dendritic cell activation via NFkB (II) (M43.1)	CSP	Up	0.612690702	0.891570607	FALSE
Dendritic Cells	complement and other receptors in DCs (M40)	CSP	Down	0.719224273	0.910818913	FALSE
Dendritic Cells	Activated (LPS) dendritic cell surface signature (S11)	CSP	Down	0.79039558	0.918478336	FALSE
ECM and Migration	integrin mediated leukocyte migration (M39)	CSP	Up	0.03238623	0.379638586	FALSE
ECM and Migration	cytoskeletal remodeling (M32.8)	CSP	Up	0.07101584	0.528082986	FALSE
ECM and Migration	receptors, cell migration (M109)	CSP	Up	0.093834324	0.538054236	FALSE
ECM and Migration	adhesion and migration, chemotaxis (M91)	CSP	Down	0.138499652	0.613189347	FALSE
ECM and Migration	cytoskeleton/actin (SRF transcription targets) (M145.0)	CSP	Up	0.271709068	0.717147021	FALSE
ECM and Migration	leukocyte migration (M88.0)	CSP	Down	0.271904084	0.717147021	FALSE
ECM and Migration	cell adhesion (GO) (M117)	CSP	Up	0.29210651	0.72200893	FALSE
ECM and Migration	leukocyte activation and migration (M45)	CSP	Up	0.317520745	0.752773901	FALSE
ECM and Migration	cell adhesion (lymphocyte homing) (M21)	CSP	Up	0.351510851	0.797513866	FALSE
ECM and Migration	extracellular region cluster (GO) (M189)	CSP	Up	0.391524511	0.816961151	FALSE
ECM and Migration	extracellular matrix, complement (M140)	CSP	Up	0.424646916	0.829604058	FALSE
ECM and Migration	cell movement, Adhesion & Platelet activation (M30)	CSP	Down	0.531050904	0.877027559	FALSE
ECM and Migration	cell adhesion (M51)	CSP	Up	0.552905277	0.877027559	FALSE
ECM and Migration	extracellular matrix (II) (M2.1)	CSP	Down	0.56278614	0.877027559	FALSE
ECM and Migration	integrins and cell adhesion (M84)	CSP	Down	0.698238958	0.910818913	FALSE
ECM and Migration	cytoskeletal remodeling (enriched for SRF targets) (M34)	CSP	Down	0.724888825	0.910818913	FALSE
ECM and Migration	cytoskeleton/actin (SRF transcription targets) (M145.1)	CSP	Down	0.752892703	0.910818913	FALSE
ECM and Migration	collagen, TGFB family et al (M77)	CSP	Down	0.859852386	0.949889285	FALSE
ECM and Migration	integrin cell surface interactions (I) (M1.0)	CSP	Up	0.951345353	0.993533539	FALSE
ECM and Migration	cell junction (GO) (M4.13)	CSP	Up	0.976623878	0.993533539	FALSE
General Immune	immuregulation - monocytes, T and B cells (M57)	CSP	Up	0.021944112	0.328035047	FALSE
General Immune	leukocyte differentiation (M160)	CSP	Up	0.061266348	0.499536668	FALSE
General Immune	CCR1, 7 and cell signaling (M59)	CSP	Up	0.061554281	0.499536668	FALSE
General Immune	immune activation - generic cluster (M37.0)	CSP	Up	0.547772148	0.877027559	FALSE
General Immune	T & B cell development, activation (M62.0)	CSP	Down	0.62093838	0.894993627	FALSE
General Immune	lymphocyte generic cluster (M60)	CSP	Up	0.699355794	0.910818913	FALSE
General Immune	myeloid cell enriched receptors and transporters (M4.3)	CSP	Up	0.730034943	0.910818913	FALSE
Inflammatory/TLR/chemokines	MHC-TLR7-TLR8 cluster (M146)	CSP	Up	0.156511254	0.618138385	FALSE
Inflammatory/TLR/chemokines	myeloid cell cytokines, metallopeptidases and laminins (M78)	CSP	Up	0.240591738	0.697248628	FALSE
Inflammatory/TLR/chemokines	proinflammatory cytokines and chemokines (M29)	CSP	Up	0.370704769	0.816961151	FALSE
Inflammatory/TLR/chemokines	TLR8-BAFF network (M25)	CSP	Up	0.407701584	0.819286041	FALSE
Inflammatory/TLR/chemokines	cell activation (IL15, IL23, TNF) (M24)	CSP	Up	0.464151811	0.844624237	FALSE
Inflammatory/TLR/chemokines	inflammatory response (M33)	CSP	Up	0.535380672	0.877027559	FALSE
Inflammatory/TLR/chemokines	chemokines and inflammatory molecules in myeloid cells (M86.0)	CSP	Up	0.579876634	0.879330679	FALSE
Inflammatory/TLR/chemokines	TLR and inflammatory signaling (M16)	CSP	Down	0.698869084	0.910818913	FALSE
Inflammatory/TLR/chemokines	chemokine cluster (II) (M27.1)	CSP	Down	0.735155203	0.910818913	FALSE
Inflammatory/TLR/chemokines	cytokines - recepters cluster (M115)	CSP	Up	0.763408189	0.910818913	FALSE
Inflammatory/TLR/chemokines	chemokine cluster (I) (M27.0)	CSP	Up	0.766573834	0.910818913	FALSE
Inflammatory/TLR/chemokines	chemokines and receptors (M38)	CSP	Up	0.776723206	0.910818913	FALSE
Inflammatory/TLR/chemokines	inflammasome receptors and signaling (M53)	CSP	Down	0.985560294	0.993533539	FALSE
Membrane Transport	Membrane, ER proteins (M134)	CSP	Down	0.374221863	0.816961151	FALSE
Membrane Transport	intracellular transport (M147)	CSP	Up	0.464543739	0.844624237	FALSE
Membrane Transport	transmembrane transport (II) (M191)	CSP	Up	0.5247771	0.877027559	FALSE
Membrane Transport	golgi membrane (II) (M237)	CSP	Down	0.681094008	0.910818913	FALSE
Membrane Transport	enriched in membrane proteins (M124)	CSP	Down	0.777001916	0.910818913	FALSE
Membrane Transport	endoplasmic reticulum (M37.2)	CSP	Up	0.792241977	0.918478336	FALSE
Membrane Transport	transmembrane transport (I) (M87)	CSP	Up	0.96289593	0.993533539	FALSE
Metabolism	proteasome (M226)	CSP	Up	1.15E-04	0.010493585	TRUE
Metabolism	nucleotide metabolism (M181)	CSP	Down	0.104550823	0.538054236	FALSE
Metabolism	lysosome (M209)	CSP	Down	0.252019434	0.702092492	FALSE
Metabolism	purine nucleotide biosynthesis (M212)	CSP	Up	0.486259152	0.847939513	FALSE
Metabolism	lipid metabolism, endoplasmic reticulum (M92)	CSP	Up	0.673190873	0.910818913	FALSE
Metabolism	lysosomal/endosomal proteins (M139)	CSP	Down	0.726046928	0.910818913	FALSE
Metabolism	heme biosynthesis (I) (M171)	CSP	Down	0.751733983	0.910818913	FALSE
Metabolism	inositol phosphate metabolism (M129)	CSP	Up	0.826098282	0.937132997	FALSE
Metabolism	heme biosynthesis (II) (M222)	CSP	Up	0.98005117	0.993533539	FALSE
Metabolism	glycerophospholipid metabolism (M114.1)	CSP	Down	0.987689812	0.993533539	FALSE
Mitochondria	respiratory electron transport chain (mitochondrion) (M238)	CSP	Up	1.28E-04	0.010493585	TRUE
Mitochondria	respiratory electron transport chain (mitochondrion) (M219)	CSP	Up	1.49E-04	0.010493585	TRUE
Mitochondria	respiratory electron transport chain (mitochondrion) (M216)	CSP	Up	9.70E-04	0.0505385	TRUE
Mitochondria	respiratory electron transport chain (mitochondrion) (M231)	CSP	Up	0.001197595	0.0505385	TRUE
Mitochondria	mitochondrial cluster (M235)	CSP	Up	0.41748782	0.829604058	FALSE
Monocytes	Monocyte surface signature (S4)	CSP	Down	0.672150497	0.910818913	FALSE
Monocytes	enriched in monocytes (IV) (M118.0)	CSP	Down	0.720245321	0.910818913	FALSE
Monocytes	enriched in monocytes (III) (M73)	CSP	Up	0.751424937	0.910818913	FALSE
Monocytes	enriched in monocytes (II) (M11.0)	CSP	Up	0.819998507	0.93524154	FALSE
Monocytes	enriched in monocytes (I) (M4.15)	CSP	Up	0.836868959	0.938899056	FALSE
Monocytes	enriched in monocytes (surface) (M118.1)	CSP	Down	0.883895991	0.963985886	FALSE
Monocytes	RA, WNT, CSF receptors network (monocyte) (M23)	CSP	Down	0.886318776	0.963985886	FALSE
Monocytes	enriched in myeloid cells and monocytes (M81)	CSP	Down	0.996501296	0.996501296	FALSE
NA	enriched for ubiquitination (M138)	CSP	Up	0.110844841	0.544945041	FALSE
NA	chromosome Y linked (M240)	CSP	Down	0.240758568	0.697248628	FALSE
NA	regulation of localization (GO) (M63)	CSP	Up	0.448990731	0.840166446	FALSE
NA	erythrocyte differentiation (M173)	CSP	Up	0.910438489	0.965339302	FALSE
Neutrophils	recruitment of neutrophils (M132)	CSP	Down	0.290015548	0.72200893	FALSE
Neutrophils	enriched in neutrophils (II) (M163)	CSP	Down	0.295042998	0.72200893	FALSE
Neutrophils	enriched in neutrophils (I) (M37.1)	CSP	Down	0.371498739	0.816961151	FALSE
Neutrophils	formyl peptide receptor mediated neutrophil response (M11.2)	CSP	Down	0.798085903	0.920197407	FALSE
NK Cells	enriched in NK cells (III) (M157)	CSP	Up	0.116450208	0.549780959	FALSE
NK Cells	NK cell surface signature (S1)	CSP	Down	0.297700365	0.72200893	FALSE
NK Cells	enriched in NK cells (receptor activation) (M61.2)	CSP	Up	0.383349686	0.816961151	FALSE
NK Cells	enriched in NK cells (II) (M61.0)	CSP	Down	0.67259193	0.910818913	FALSE
NK Cells	enriched in NK cells (I) (M7.2)	CSP	Down	0.951911831	0.993533539	FALSE
Nuclear Pore	nuclear pore, transport; mRNA splicing, processing (M143)	CSP	Up	0.03115301	0.379638586	FALSE
Nuclear Pore	nuclear pore complex (M106.0)	CSP	Up	0.142399422	0.613189347	FALSE
Nuclear Pore	nuclear pore complex (mitosis) (M106.1)	CSP	Up	0.484552734	0.847939513	FALSE
Plasma Cells	plasma cells & B cells, immunoglobulins (M156.0)	CSP	Up	0.407462536	0.819286041	FALSE
Plasma Cells	Plasma cell surface signature (S3)	CSP	Down	0.767791289	0.910818913	FALSE
Platelets/Coagulation	platelet activation (I) (M32.0)	CSP	Up	0.046194738	0.464147128	FALSE
Platelets/Coagulation	platelet activation - actin binding (M196)	CSP	Down	0.142327969	0.613189347	FALSE
Platelets/Coagulation	platelet activation (II) (M32.1)	CSP	Up	0.213182433	0.681939685	FALSE
Platelets/Coagulation	platelet activation and degranulation (M85)	CSP	Down	0.711856904	0.910818913	FALSE
Platelets/Coagulation	platelet activation (III) (M42)	CSP	Up	0.750443062	0.910818913	FALSE
Platelets/Coagulation	blood coagulation (M11.1)	CSP	Up	0.986846332	0.993533539	FALSE
Signal Transduction	PLK1 signaling events (M4.2)	CSP	Down	0.075070814	0.528082986	FALSE
Signal Transduction	small GTPase mediated signal transduction (M215)	CSP	Up	0.092466691	0.538054236	FALSE
Signal Transduction	enriched in G-protein coupled receptors (M130)	CSP	Down	0.294458108	0.72200893	FALSE
Signal Transduction	growth factor induced, enriched in nuclear receptor subfamily 4 (M94)	CSP	Up	0.39146264	0.816961151	FALSE
Signal Transduction	G protein coupled receptors cluster (M155)	CSP	Down	0.394929087	0.816961151	FALSE
Signal Transduction	regulation of signal transduction (M3)	CSP	Down	0.561078473	0.877027559	FALSE
Signal Transduction	MAPK, RAS signaling (M100)	CSP	Up	0.610718887	0.891570607	FALSE
Signal Transduction	suppression of MAPK signaling (M56)	CSP	Down	0.708304335	0.910818913	FALSE
Signal Transduction	Rho GTPase cycle (M4.14)	CSP	Down	0.841933639	0.938899056	FALSE
Signal Transduction	phosphatidylinositol signaling system (M101)	CSP	Up	0.897254177	0.964835152	FALSE
Signal Transduction	enriched for SMAD2/3 signaling (M97)	CSP	Up	0.901014318	0.964835152	FALSE
T Cells	T cell activation and signaling (M5.1)	CSP	Up	0.01454671	0.279032337	FALSE
T Cells	T cell surface signature (S0)	CSP	Up	0.02655472	0.350190375	FALSE
T Cells	T cell differentiation (Th2) (M19)	CSP	Up	0.100753102	0.538054236	FALSE
T Cells	T cell activation (IV) (M52)	CSP	Up	0.1020974	0.538054236	FALSE
T Cells	IL2, IL7, TCR network (M65)	CSP	Up	0.111055151	0.544945041	FALSE
T Cells	cell division (stimulated CD4+ T cells) (M46)	CSP	Down	0.152650128	0.618138385	FALSE
T Cells	T cell differentiation via ITK and PKC (M18)	CSP	Up	0.158596045	0.618138385	FALSE
T Cells	CD4 T cell surface signature Th2-stimulated (S7)	CSP	Up	0.159611958	0.618138385	FALSE
T Cells	T cell surface, activation (M36)	CSP	Down	0.166985251	0.618138385	FALSE
T Cells	CD28 costimulation (M12)	CSP	Down	0.173893234	0.618376637	FALSE
T Cells	T cell signaling and costimulation (M44)	CSP	Up	0.178772393	0.618376637	FALSE
T Cells	T cell differentiation (M14)	CSP	Up	0.206600598	0.681136348	FALSE
T Cells	enriched in T cells (I) (M7.0)	CSP	Up	0.217344274	0.681939685	FALSE
T Cells	enriched in T cells (II) (M223)	CSP	Up	0.219772031	0.681939685	FALSE
T Cells	T cell activation (I) (M7.1)	CSP	Up	0.252886395	0.702092492	FALSE
T Cells	CORO1A-DEF6 network (I) (M32.2)	CSP	Up	0.449946959	0.840166446	FALSE
T Cells	double positive thymocytes (M126)	CSP	Up	0.545101004	0.877027559	FALSE
T Cells	T cell activation (II) (M7.3)	CSP	Up	0.565287905	0.877027559	FALSE
T Cells	T cell activation (III) (M7.4)	CSP	Up	0.623526366	0.894993627	FALSE
T Cells	CORO1A-DEF6 network (II) (M32.4)	CSP	Up	0.682434933	0.910818913	FALSE
T Cells	signaling in T cells (II) (M35.1)	CSP	Down	0.77638037	0.910818913	FALSE
T Cells	signaling in T cells (I) (M35.0)	CSP	Up	0.901980229	0.964835152	FALSE
Transcription	spliceosome (M250)	CSP	Up	0.008918356	0.188177321	TRUE
Transcription	transcription elongation, RNA polymerase II (M234)	CSP	Up	0.022286142	0.328035047	FALSE
Transcription	E2F transcription factor network (M8)	CSP	Down	0.023320027	0.328035047	FALSE
Transcription	targets of FOSL1/2 (M0)	CSP	Up	0.05883328	0.499536668	FALSE
Transcription	AP-1 transcription factor network (M20)	CSP	Up	0.075082889	0.528082986	FALSE
Transcription	enriched for TF motif TTCNRGNNNNTTC (M172)	CSP	Up	0.089311499	0.538054236	FALSE
Transcription	E2F1 targets (Q4) (M10.1)	CSP	Down	0.099318245	0.538054236	FALSE
Transcription	enriched for TF motif PAX3 (M179)	CSP	Up	0.117251863	0.549780959	FALSE
Transcription	transcriptional targets of glucocorticoid receptor (M74)	CSP	Down	0.156277802	0.618138385	FALSE
Transcription	putative targets of PAX3 (M89.1)	CSP	Up	0.175386386	0.618376637	FALSE
Transcription	enriched in DNA interacting proteins (M182)	CSP	Up	0.226775131	0.686175524	FALSE
Transcription	enriched for TF motif TNCATNTCCYR (M232)	CSP	Up	0.276396418	0.719995609	FALSE
Transcription	transcription regulation in cell development (M49)	CSP	Down	0.29748151	0.72200893	FALSE
Transcription	putative targets of PAX3 (M89.0)	CSP	Up	0.337020104	0.775002323	FALSE
Transcription	C-MYC transcriptional network (M4.12)	CSP	Up	0.38968896	0.816961151	FALSE
Transcription	enriched for promoter motif NATCACGTGAY (putative SREBF1 targets) (M178)	CSP	Up	0.432495006	0.829604058	FALSE
Transcription	regulation of transcription, transcription factors (M213)	CSP	Up	0.579295615	0.879330679	FALSE
Transcription	KLF12 targets network (M32.3)	CSP	Up	0.587468979	0.879330679	FALSE
Transcription	E2F1 targets (Q3) (M10.0)	CSP	Down	0.745047478	0.910818913	FALSE
Translation	translation initiation (M227)	CSP	Up	0.005914375	0.17267947	TRUE
Translation	chaperonin mediated protein folding (I) (M204.0)	CSP	Up	0.006547089	0.17267947	TRUE
Translation	chaperonin mediated protein folding (II) (M204.1)	CSP	Up	0.018845205	0.328035047	FALSE
Translation	translation initiation factor 3 complex (M245)	CSP	Up	0.054477902	0.499536668	FALSE
Antigen Presentation	regulation of antigen presentation and immune response (M5.0)	AMA1	Up	0.184063091	0.49791426	FALSE
Antigen Presentation	antigen processing and presentation (M200)	AMA1	Up	0.31552124	0.610779648	FALSE
Antigen Presentation	enriched in antigen presentation (I) (M71)	AMA1	Up	0.384679216	0.649338517	FALSE
Antigen Presentation	enriched in antigen presentation (II) (M95.0)	AMA1	Up	0.517459695	0.74274827	FALSE
Antigen Presentation	enriched in antigen presentation (III) (M95.1)	AMA1	Up	0.634444028	0.823515608	FALSE
Antigen Presentation	antigen presentation (lipids and proteins) (M28)	AMA1	Down	0.91707271	0.961126338	FALSE
Antiviral/IFN	RIG-1 like receptor signaling (M68)	AMA1	Down	6.05E-04	0.030975207	TRUE
Antiviral/IFN	antiviral IFN signature (M75)	AMA1	Down	0.002298859	0.069294184	TRUE
Antiviral/IFN	viral sensing & immunity; IRF2 targets network (I) (M111.0)	AMA1	Down	0.006546374	0.153476107	TRUE
Antiviral/IFN	innate activation by cytosolic DNA sensing (M13)	AMA1	Down	0.008248295	0.160862478	TRUE
Antiviral/IFN	type I interferon response (M127)	AMA1	Down	0.015935109	0.192977849	TRUE
Antiviral/IFN	viral sensing & immunity; IRF2 targets network (II) (M111.1)	AMA1	Down	0.016462565	0.192977849	TRUE
Antiviral/IFN	innate antiviral response (M150)	AMA1	Down	0.022140147	0.218011665	FALSE
B Cells	enriched in B cells (I) (M47.0)	AMA1	Up	0.004491521	0.118463876	TRUE
B Cells	enriched in naive and memory B cells (M83)	AMA1	Up	0.028954193	0.22627166	FALSE
B Cells	enriched in B cells (II) (M47.1)	AMA1	Up	0.034915145	0.24556985	FALSE
B Cells	enriched in B cells (VI) (M69)	AMA1	Up	0.036369688	0.24754852	FALSE
B Cells	enriched in B cells (V) (M47.4)	AMA1	Up	0.046025214	0.269171866	FALSE
B Cells	enriched in B cells (III) (M47.2)	AMA1	Up	0.17185444	0.49791426	FALSE
B Cells	B cell development (M9)	AMA1	Up	0.258723445	0.586996203	FALSE
B Cells	B cell surface signature (S2)	AMA1	Up	0.359700745	0.63647256	FALSE
B Cells	BCR signaling (M54)	AMA1	Up	0.717271014	0.855669033	FALSE
B Cells	Naive B cell surface signature (S8)	AMA1	Up	0.725899322	0.855669033	FALSE
B Cells	Memory B cell surface signature (S9)	AMA1	Up	0.829454587	0.930930414	FALSE
B Cells	enriched in B cells (IV) (M47.3)	AMA1	Up	0.868003055	0.939223819	FALSE
B Cells	B cell development/activation (M58)	AMA1	Up	0.978282802	0.988817596	FALSE
Cell Cycle	cell division (M37.3)	AMA1	Up	7.34E-04	0.030975207	TRUE
Cell Cycle	cell cycle (II) (M4.10)	AMA1	Down	0.038157659	0.251602062	FALSE
Cell Cycle	mitotic cell division (M6)	AMA1	Up	0.118295535	0.409186195	FALSE
Cell Cycle	cell division in stimulated CD4 T cells (M4.6)	AMA1	Down	0.120264644	0.409287742	FALSE
Cell Cycle	cell cycle and transcription (M4.0)	AMA1	Down	0.125821282	0.414817039	FALSE
Cell Cycle	DNA repair (M76)	AMA1	Down	0.274451257	0.597024563	FALSE
Cell Cycle	mitotic cell cycle (M4.7)	AMA1	Down	0.28423639	0.597024563	FALSE
Cell Cycle	mitosis (TF motif CCAATNNSNNNGCG) (M169)	AMA1	Up	0.299927032	0.597024563	FALSE
Cell Cycle	cell cycle (III) (M103)	AMA1	Up	0.339409409	0.620487337	FALSE
Cell Cycle	mitotic cell cycle - DNA replication (M4.4)	AMA1	Up	0.39219157	0.656765248	FALSE
Cell Cycle	cell division - E2F transcription network (M4.8)	AMA1	Up	0.479234034	0.732355011	FALSE
Cell Cycle	enriched in cell cycle (M167)	AMA1	Down	0.480892818	0.732355011	FALSE
Cell Cycle	mitotic cell cycle in stimulated CD4 T cells (M4.11)	AMA1	Up	0.509449079	0.741336245	FALSE
Cell Cycle	mismatch repair (I) (M22.0)	AMA1	Up	0.536444388	0.755784852	FALSE
Cell Cycle	mitotic cell cycle in stimulated CD4 T cells (M4.9)	AMA1	Up	0.55276379	0.762308234	FALSE
Cell Cycle	cell cycle and growth arrest (M31)	AMA1	Down	0.615091245	0.810334173	FALSE
Cell Cycle	cell cycle, mitotic phase (M230)	AMA1	Up	0.705586064	0.855669033	FALSE
Cell Cycle	mitotic cell cycle in stimulated CD4 T cells (M4.5)	AMA1	Down	0.725493005	0.855669033	FALSE
Cell Cycle	mismatch repair (II) (M22.1)	AMA1	Down	0.859226076	0.939223819	FALSE
Cell Cycle	cell cycle, ATP binding (M144)	AMA1	Up	0.8666221	0.939223819	FALSE
Cell Cycle	cell cycle (I) (M4.1)	AMA1	Down	0.920130428	0.961126338	FALSE
Complement	complement activation (I) (M112.0)	AMA1	Down	0.066082782	0.294043178	FALSE
Dendritic Cells	enriched in activated dendritic cells (II) (M165)	AMA1	Down	0.026675995	0.221174025	FALSE
Dendritic Cells	activated dendritic cells (M67)	AMA1	Down	0.034702429	0.24556985	FALSE
Dendritic Cells	Activated (LPS) dendritic cell surface signature (S11)	AMA1	Down	0.063027445	0.289208462	FALSE
Dendritic Cells	DC surface signature (S5)	AMA1	Down	0.142325288	0.46200978	FALSE
Dendritic Cells	proinflammatory dendritic cell, myeloid cell response (M86.1)	AMA1	Down	0.146111375	0.467113638	FALSE
Dendritic Cells	enriched in activated dendritic cells (I) (M119)	AMA1	Down	0.287309476	0.597024563	FALSE
Dendritic Cells	Resting dendritic cell surface signature (S10)	AMA1	Down	0.36428277	0.63647256	FALSE
Dendritic Cells	enriched in activated dendritic cells/monocytes (M64)	AMA1	Down	0.370468218	0.64072782	FALSE
Dendritic Cells	myeloid, dendritic cell activation via NFkB (II) (M43.1)	AMA1	Down	0.429854598	0.703095506	FALSE
Dendritic Cells	CD1 and other DC receptors (M50)	AMA1	Up	0.636175565	0.823515608	FALSE
Dendritic Cells	enriched in dendritic cells (M168)	AMA1	Up	0.811729653	0.925810577	FALSE
Dendritic Cells	complement and other receptors in DCs (M40)	AMA1	Down	0.86252586	0.939223819	FALSE
Dendritic Cells	myeloid, dendritic cell activation via NFkB (I) (M43.0)	AMA1	Up	0.881781521	0.944756859	FALSE
ECM and Migration	integrin mediated leukocyte migration (M39)	AMA1	Up	0.019760987	0.218011665	FALSE
ECM and Migration	cell movement, Adhesion & Platelet activation (M30)	AMA1	Down	0.073603432	0.310606482	FALSE
ECM and Migration	cytoskeleton/actin (SRF transcription targets) (M145.0)	AMA1	Up	0.099115694	0.373453776	FALSE
ECM and Migration	cell adhesion (M51)	AMA1	Down	0.215187224	0.5407881	FALSE
ECM and Migration	cell adhesion (lymphocyte homing) (M21)	AMA1	Up	0.249414406	0.578312524	FALSE
ECM and Migration	receptors, cell migration (M109)	AMA1	Up	0.291371719	0.597024563	FALSE
ECM and Migration	cytoskeletal remodeling (M32.8)	AMA1	Up	0.336277522	0.620487337	FALSE
ECM and Migration	leukocyte migration (M88.0)	AMA1	Down	0.417331927	0.693362493	FALSE
ECM and Migration	integrin cell surface interactions (I) (M1.0)	AMA1	Up	0.45029101	0.725277886	FALSE
ECM and Migration	extracellular region cluster (GO) (M189)	AMA1	Down	0.45416696	0.72573094	FALSE
ECM and Migration	cell adhesion (GO) (M117)	AMA1	Up	0.523926956	0.746949917	FALSE
ECM and Migration	leukocyte activation and migration (M45)	AMA1	Up	0.651300192	0.837953296	FALSE
ECM and Migration	collagen, TGFB family et al (M77)	AMA1	Down	0.693813541	0.851131728	FALSE
ECM and Migration	integrins and cell adhesion (M84)	AMA1	Down	0.86430605	0.939223819	FALSE
ECM and Migration	cytoskeletal remodeling (enriched for SRF targets) (M34)	AMA1	Down	0.883673888	0.944756859	FALSE
ECM and Migration	cytoskeleton/actin (SRF transcription targets) (M145.1)	AMA1	Down	0.949715402	0.982303675	FALSE
ECM and Migration	adhesion and migration, chemotaxis (M91)	AMA1	Down	0.963906102	0.988817596	FALSE
ECM and Migration	cell junction (GO) (M4.13)	AMA1	Down	0.972945442	0.988817596	FALSE
ECM and Migration	extracellular matrix (II) (M2.1)	AMA1	Down	0.977382242	0.988817596	FALSE
ECM and Migration	extracellular matrix, complement (M140)	AMA1	Up	0.988817596	0.988817596	FALSE
General Immune	leukocyte differentiation (M160)	AMA1	Up	0.16185844	0.49791426	FALSE
General Immune	myeloid cell enriched receptors and transporters (M4.3)	AMA1	Down	0.236275338	0.566523821	FALSE
General Immune	immuregulation - monocytes, T and B cells (M57)	AMA1	Up	0.349314723	0.626036027	FALSE
General Immune	CCR1, 7 and cell signaling (M59)	AMA1	Up	0.57909246	0.783259673	FALSE
General Immune	T & B cell development, activation (M62.0)	AMA1	Up	0.609261096	0.808516298	FALSE
General Immune	lymphocyte generic cluster (M60)	AMA1	Up	0.88654909	0.944756859	FALSE
General Immune	immune activation - generic cluster (M37.0)	AMA1	Down	0.897803882	0.951942809	FALSE
Inflammatory/TLR/chemokines	chemokine cluster (II) (M27.1)	AMA1	Down	0.009247735	0.160862478	TRUE
Inflammatory/TLR/chemokines	chemokines and receptors (M38)	AMA1	Down	0.07154418	0.308077999	FALSE
Inflammatory/TLR/chemokines	proinflammatory cytokines and chemokines (M29)	AMA1	Down	0.175031856	0.49791426	FALSE
Inflammatory/TLR/chemokines	MHC-TLR7-TLR8 cluster (M146)	AMA1	Up	0.182958379	0.49791426	FALSE
Inflammatory/TLR/chemokines	chemokine cluster (I) (M27.0)	AMA1	Down	0.219719765	0.545422005	FALSE
Inflammatory/TLR/chemokines	TLR and inflammatory signaling (M16)	AMA1	Down	0.23590079	0.566523821	FALSE
Inflammatory/TLR/chemokines	chemokines and inflammatory molecules in myeloid cells (M86.0)	AMA1	Down	0.241268552	0.568888205	FALSE
Inflammatory/TLR/chemokines	inflammatory response (M33)	AMA1	Down	0.299028035	0.597024563	FALSE
Inflammatory/TLR/chemokines	cell activation (IL15, IL23, TNF) (M24)	AMA1	Down	0.32064695	0.615059149	FALSE
Inflammatory/TLR/chemokines	cytokines - recepters cluster (M115)	AMA1	Down	0.341121	0.620487337	FALSE
Inflammatory/TLR/chemokines	myeloid cell cytokines, metallopeptidases and laminins (M78)	AMA1	Down	0.544072105	0.760259697	FALSE
Inflammatory/TLR/chemokines	TLR8-BAFF network (M25)	AMA1	Down	0.566242312	0.775825505	FALSE
Inflammatory/TLR/chemokines	inflammasome receptors and signaling (M53)	AMA1	Down	0.656903658	0.840040436	FALSE
Membrane Transport	enriched in membrane proteins (M124)	AMA1	Down	0.027253671	0.221174025	FALSE
Membrane Transport	transmembrane transport (I) (M87)	AMA1	Down	0.048962368	0.271869993	FALSE
Membrane Transport	Membrane, ER proteins (M134)	AMA1	Down	0.270143145	0.597024563	FALSE
Membrane Transport	transmembrane transport (II) (M191)	AMA1	Up	0.422892526	0.697111899	FALSE
Membrane Transport	golgi membrane (II) (M237)	AMA1	Down	0.683043047	0.847776958	FALSE
Membrane Transport	endoplasmic reticulum (M37.2)	AMA1	Down	0.692967399	0.851131728	FALSE
Membrane Transport	intracellular transport (M147)	AMA1	Up	0.819364926	0.929494621	FALSE
Metabolism	heme biosynthesis (II) (M222)	AMA1	Down	0.01067334	0.160862478	TRUE
Metabolism	heme biosynthesis (I) (M171)	AMA1	Down	0.021785626	0.218011665	FALSE
Metabolism	proteasome (M226)	AMA1	Up	0.02500544	0.219839494	FALSE
Metabolism	purine nucleotide biosynthesis (M212)	AMA1	Up	0.242653737	0.568888205	FALSE
Metabolism	lysosomal/endosomal proteins (M139)	AMA1	Down	0.255004289	0.584846793	FALSE
Metabolism	nucleotide metabolism (M181)	AMA1	Up	0.306622766	0.599050034	FALSE
Metabolism	lysosome (M209)	AMA1	Down	0.364991373	0.63647256	FALSE
Metabolism	inositol phosphate metabolism (M129)	AMA1	Up	0.514795594	0.74274827	FALSE
Metabolism	glycerophospholipid metabolism (M114.1)	AMA1	Up	0.669936117	0.840962537	FALSE
Metabolism	lipid metabolism, endoplasmic reticulum (M92)	AMA1	Up	0.935354361	0.972215617	FALSE
Mitochondria	respiratory electron transport chain (mitochondrion) (M231)	AMA1	Up	0.060351644	0.289208462	FALSE
Mitochondria	respiratory electron transport chain (mitochondrion) (M219)	AMA1	Up	0.110901025	0.399960078	FALSE
Mitochondria	respiratory electron transport chain (mitochondrion) (M216)	AMA1	Up	0.271121299	0.597024563	FALSE
Mitochondria	respiratory electron transport chain (mitochondrion) (M238)	AMA1	Up	0.33901756	0.620487337	FALSE
Mitochondria	mitochondrial cluster (M235)	AMA1	Up	0.577617997	0.783259673	FALSE
Monocytes	enriched in myeloid cells and monocytes (M81)	AMA1	Down	0.047200754	0.269171866	FALSE
Monocytes	enriched in monocytes (II) (M11.0)	AMA1	Down	0.063050186	0.289208462	FALSE
Monocytes	Monocyte surface signature (S4)	AMA1	Down	0.085835004	0.348292035	FALSE
Monocytes	enriched in monocytes (IV) (M118.0)	AMA1	Down	0.12518531	0.414817039	FALSE
Monocytes	enriched in monocytes (surface) (M118.1)	AMA1	Down	0.169414597	0.49791426	FALSE
Monocytes	enriched in monocytes (I) (M4.15)	AMA1	Down	0.350105456	0.626036027	FALSE
Monocytes	RA, WNT, CSF receptors network (monocyte) (M23)	AMA1	Up	0.552491182	0.762308234	FALSE
Monocytes	enriched in monocytes (III) (M73)	AMA1	Down	0.987063514	0.988817596	FALSE
NA	enriched for ubiquitination (M138)	AMA1	Up	0.093080271	0.370564853	FALSE
NA	chromosome Y linked (M240)	AMA1	Down	0.103924261	0.384702089	FALSE
NA	regulation of localization (GO) (M63)	AMA1	Down	0.305057228	0.599050034	FALSE
NA	erythrocyte differentiation (M173)	AMA1	Down	0.457451256	0.72573094	FALSE
Neutrophils	recruitment of neutrophils (M132)	AMA1	Down	0.056265385	0.289208462	FALSE
Neutrophils	formyl peptide receptor mediated neutrophil response (M11.2)	AMA1	Down	0.096170915	0.373453776	FALSE
Neutrophils	enriched in neutrophils (I) (M37.1)	AMA1	Down	0.156558947	0.493043847	FALSE
Neutrophils	enriched in neutrophils (II) (M163)	AMA1	Down	0.496335387	0.732355011	FALSE
NK Cells	enriched in NK cells (I) (M7.2)	AMA1	Up	0.085461486	0.348292035	FALSE
NK Cells	enriched in NK cells (receptor activation) (M61.2)	AMA1	Up	0.175169746	0.49791426	FALSE
NK Cells	enriched in NK cells (II) (M61.0)	AMA1	Up	0.179583626	0.49791426	FALSE
NK Cells	enriched in NK cells (III) (M157)	AMA1	Up	0.196801598	0.519064214	FALSE
NK Cells	NK cell surface signature (S1)	AMA1	Down	0.503127171	0.737221063	FALSE
Nuclear Pore	nuclear pore complex (M106.0)	AMA1	Up	0.039351569	0.251611548	FALSE
Nuclear Pore	nuclear pore complex (mitosis) (M106.1)	AMA1	Up	0.043681686	0.269171866	FALSE
Nuclear Pore	nuclear pore, transport; mRNA splicing, processing (M143)	AMA1	Up	0.113732724	0.399960078	FALSE
Plasma Cells	plasma cells & B cells, immunoglobulins (M156.0)	AMA1	Up	0.056316481	0.289208462	FALSE
Plasma Cells	Plasma cell surface signature (S3)	AMA1	Up	0.81100494	0.925810577	FALSE
Platelets/Coagulation	platelet activation - actin binding (M196)	AMA1	Down	0.014593529	0.192452163	TRUE
Platelets/Coagulation	platelet activation and degranulation (M85)	AMA1	Down	0.194644633	0.519064214	FALSE
Platelets/Coagulation	platelet activation (II) (M32.1)	AMA1	Up	0.450137144	0.725277886	FALSE
Platelets/Coagulation	blood coagulation (M11.1)	AMA1	Down	0.492077897	0.732355011	FALSE
Platelets/Coagulation	platelet activation (I) (M32.0)	AMA1	Up	0.749661737	0.875230503	FALSE
Platelets/Coagulation	platelet activation (III) (M42)	AMA1	Up	0.919484341	0.961126338	FALSE
Signal Transduction	suppression of MAPK signaling (M56)	AMA1	Down	0.031433294	0.236872325	FALSE
Signal Transduction	G protein coupled receptors cluster (M155)	AMA1	Down	0.059448565	0.289208462	FALSE
Signal Transduction	enriched for SMAD2/3 signaling (M97)	AMA1	Up	0.215290049	0.5407881	FALSE
Signal Transduction	small GTPase mediated signal transduction (M215)	AMA1	Up	0.231299926	0.566523821	FALSE
Signal Transduction	regulation of signal transduction (M3)	AMA1	Down	0.376347493	0.645604235	FALSE
Signal Transduction	PLK1 signaling events (M4.2)	AMA1	Down	0.384029549	0.649338517	FALSE
Signal Transduction	MAPK, RAS signaling (M100)	AMA1	Up	0.587786757	0.786118373	FALSE
Signal Transduction	enriched in G-protein coupled receptors (M130)	AMA1	Up	0.707942467	0.855669033	FALSE
Signal Transduction	Rho GTPase cycle (M4.14)	AMA1	Down	0.718728048	0.855669033	FALSE
Signal Transduction	phosphatidylinositol signaling system (M101)	AMA1	Down	0.750790147	0.875230503	FALSE
Signal Transduction	growth factor induced, enriched in nuclear receptor subfamily 4 (M94)	AMA1	Up	0.805939992	0.925810577	FALSE
T Cells	T cell activation (I) (M7.1)	AMA1	Up	2.46E-05	0.003310271	TRUE
T Cells	T cell differentiation (Th2) (M19)	AMA1	Up	3.14E-05	0.003310271	TRUE
T Cells	enriched in T cells (I) (M7.0)	AMA1	Up	1.74E-04	0.012218132	TRUE
T Cells	T cell surface signature (S0)	AMA1	Up	0.001326172	0.046637048	TRUE
T Cells	T cell activation and signaling (M5.1)	AMA1	Up	0.009566721	0.160862478	TRUE
T Cells	CD4 T cell surface signature Th2-stimulated (S7)	AMA1	Up	0.010591373	0.160862478	TRUE
T Cells	T cell differentiation (M14)	AMA1	Up	0.014342389	0.192452163	TRUE
T Cells	T cell activation (III) (M7.4)	AMA1	Up	0.023693625	0.218011665	FALSE
T Cells	enriched in T cells (II) (M223)	AMA1	Up	0.044652276	0.269171866	FALSE
T Cells	signaling in T cells (I) (M35.0)	AMA1	Down	0.066891339	0.294043178	FALSE
T Cells	T cell activation (II) (M7.3)	AMA1	Up	0.098544034	0.373453776	FALSE
T Cells	IL2, IL7, TCR network (M65)	AMA1	Up	0.111953793	0.399960078	FALSE
T Cells	T cell signaling and costimulation (M44)	AMA1	Up	0.163755955	0.49791426	FALSE
T Cells	T cell surface, activation (M36)	AMA1	Down	0.294537956	0.597024563	FALSE
T Cells	CD28 costimulation (M12)	AMA1	Up	0.331507906	0.620487337	FALSE
T Cells	T cell activation (IV) (M52)	AMA1	Up	0.487418269	0.732355011	FALSE
T Cells	CORO1A-DEF6 network (I) (M32.2)	AMA1	Up	0.53728781	0.755784852	FALSE
T Cells	cell division (stimulated CD4+ T cells) (M46)	AMA1	Down	0.58865736	0.786118373	FALSE
T Cells	signaling in T cells (II) (M35.1)	AMA1	Down	0.668851373	0.840962537	FALSE
T Cells	T cell differentiation via ITK and PKC (M18)	AMA1	Up	0.67356715	0.840962537	FALSE
T Cells	double positive thymocytes (M126)	AMA1	Down	0.805296238	0.925810577	FALSE
T Cells	CORO1A-DEF6 network (II) (M32.4)	AMA1	Down	0.846449919	0.939223819	FALSE
Transcription	spliceosome (M250)	AMA1	Up	0.059796772	0.289208462	FALSE
Transcription	transcription regulation in cell development (M49)	AMA1	Down	0.060725978	0.289208462	FALSE
Transcription	enriched for TF motif PAX3 (M179)	AMA1	Up	0.183760779	0.49791426	FALSE
Transcription	transcription elongation, RNA polymerase II (M234)	AMA1	Up	0.203261909	0.52401132	FALSE
Transcription	C-MYC transcriptional network (M4.12)	AMA1	Up	0.280356264	0.597024563	FALSE
Transcription	enriched for TF motif TTCNRGNNNNTTC (M172)	AMA1	Up	0.284295919	0.597024563	FALSE
Transcription	AP-1 transcription factor network (M20)	AMA1	Down	0.290230323	0.597024563	FALSE
Transcription	putative targets of PAX3 (M89.1)	AMA1	Up	0.295556491	0.597024563	FALSE
Transcription	putative targets of PAX3 (M89.0)	AMA1	Up	0.331065518	0.620487337	FALSE
Transcription	targets of FOSL1/2 (M0)	AMA1	Down	0.476213805	0.732355011	FALSE
Transcription	transcriptional targets of glucocorticoid receptor (M74)	AMA1	Up	0.485260335	0.732355011	FALSE
Transcription	regulation of transcription, transcription factors (M213)	AMA1	Up	0.487733771	0.732355011	FALSE
Transcription	enriched for TF motif TNCATNTCCYR (M232)	AMA1	Up	0.494813359	0.732355011	FALSE
Transcription	KLF12 targets network (M32.3)	AMA1	Down	0.618311857	0.810334173	FALSE
Transcription	E2F transcription factor network (M8)	AMA1	Down	0.660897622	0.840056616	FALSE
Transcription	enriched for promoter motif NATCACGTGAY (putative SREBF1 targets) (M178)	AMA1	Up	0.710204029	0.855669033	FALSE
Transcription	E2F1 targets (Q4) (M10.1)	AMA1	Down	0.828734741	0.930930414	FALSE
Transcription	E2F1 targets (Q3) (M10.0)	AMA1	Down	0.854676238	0.939223819	FALSE
Transcription	enriched in DNA interacting proteins (M182)	AMA1	Up	0.979523903	0.988817596	FALSE
Translation	translation initiation factor 3 complex (M245)	AMA1	Up	0.023764305	0.218011665	FALSE
Translation	translation initiation (M227)	AMA1	Up	0.166263123	0.49791426	FALSE
Translation	chaperonin mediated protein folding (II) (M204.1)	AMA1	Up	0.20364421	0.52401132	FALSE
Translation	chaperonin mediated protein folding (I) (M204.0)	AMA1	Up	0.46842133	0.732355011	FALSE
