# Supplementary material for: Transcriptional correlates of malaria in RTS,S/AS01-vaccinated African children: a matched case–control study
Source: eLife. 2022 Jan 21;11:e70393. doi: 10.7554/eLife.70393 (PMC8782572; doi:10.7554/eLife.70393)
Supplement: Figure 3—figure supplement 1—source data 1. [file elife-70393-fig3-figsupp1-data1.csv]

Annotation	BTM	Stimulation	Direction	PValue	FDR	is_significant
Antigen Presentation	antigen processing and presentation (M200)	DMSO	Up	9.67E-07	1.31E-05	TRUE
Antigen Presentation	enriched in antigen presentation (III) (M95.1)	DMSO	Up	0.008328222	0.020476003	TRUE
B Cells	enriched in B cells (I) (M47.0)	DMSO	Up	1.49E-07	3.38E-06	TRUE
B Cells	enriched in B cells (II) (M47.1)	DMSO	Up	8.30E-06	8.07E-05	TRUE
B Cells	enriched in B cells (VI) (M69)	DMSO	Up	1.13E-05	9.58E-05	TRUE
B Cells	enriched in B cells (III) (M47.2)	DMSO	Up	0.050599676	0.092994	TRUE
B Cells	B cell surface signature (S2)	DMSO	Up	0.202755393	0.287236807	FALSE
B Cells	Naive B cell surface signature (S8)	DMSO	Down	0.937734651	0.975817583	FALSE
Cell Cycle	mismatch repair (I) (M22.0)	DMSO	Up	5.25E-04	0.002355498	TRUE
Cell Cycle	mitosis (TF motif CCAATNNSNNNGCG) (M169)	DMSO	Up	0.008431295	0.020476003	TRUE
Cell Cycle	cell cycle, ATP binding (M144)	DMSO	Up	0.07066804	0.11720553	TRUE
Cell Cycle	mitotic cell cycle in stimulated CD4 T cells (M4.9)	DMSO	Down	0.566984569	0.713980569	FALSE
Cell Cycle	cell division (M37.3)	DMSO	Up	0.652567746	0.804110737	FALSE
Complement	complement activation (I) (M112.0)	DMSO	Down	0.008764238	0.020550628	TRUE
Dendritic Cells	enriched in activated dendritic cells/monocytes (M64)	DMSO	Down	5.74E-07	9.77E-06	TRUE
Dendritic Cells	DC surface signature (S5)	DMSO	Down	2.81E-04	0.001468347	TRUE
Dendritic Cells	complement and other receptors in DCs (M40)	DMSO	Down	0.103681955	0.167866023	TRUE
ECM and Migration	leukocyte migration (M88.0)	DMSO	Down	0.110690719	0.175045789	TRUE
ECM and Migration	cytoskeletal remodeling (M32.8)	DMSO	Down	0.695698801	0.829956465	FALSE
ECM and Migration	cell adhesion (GO) (M117)	DMSO	Down	0.72242213	0.846977669	FALSE
ECM and Migration	leukocyte activation and migration (M45)	DMSO	Up	0.987044847	0.987044847	FALSE
General Immune	immune activation - generic cluster (M37.0)	DMSO	Down	3.93E-05	2.97E-04	TRUE
General Immune	myeloid cell enriched receptors and transporters (M4.3)	DMSO	Down	1.75E-04	9.91E-04	TRUE
General Immune	leukocyte differentiation (M160)	DMSO	Down	0.96048839	0.975817583	FALSE
Inflammatory/TLR/chemokines	chemokines and inflammatory molecules in myeloid cells (M86.0)	DMSO	Down	7.21E-08	2.45E-06	TRUE
Inflammatory/TLR/chemokines	proinflammatory cytokines and chemokines (M29)	DMSO	Down	3.49E-06	3.96E-05	TRUE
Membrane Transport	transmembrane transport (I) (M87)	DMSO	Down	0.001852354	0.005725459	TRUE
Membrane Transport	enriched in membrane proteins (M124)	DMSO	Down	0.002009515	0.005941175	TRUE
Membrane Transport	intracellular transport (M147)	DMSO	Up	0.193032647	0.279281276	FALSE
Metabolism	proteasome (M226)	DMSO	Up	0.001344628	0.004691451	TRUE
Metabolism	purine nucleotide biosynthesis (M212)	DMSO	Up	0.004556949	0.011918174	TRUE
Metabolism	heme biosynthesis (II) (M222)	DMSO	Down	0.309115713	0.404228241	FALSE
Mitochondria	respiratory electron transport chain (mitochondrion) (M216)	DMSO	Up	5.54E-04	0.002355498	TRUE
Mitochondria	respiratory electron transport chain (mitochondrion) (M238)	DMSO	Up	0.001379838	0.004691451	TRUE
Mitochondria	respiratory electron transport chain (mitochondrion) (M219)	DMSO	Up	0.00182851	0.005725459	TRUE
Mitochondria	respiratory electron transport chain (mitochondrion) (M231)	DMSO	Up	0.017638199	0.038690243	TRUE
Monocytes	enriched in monocytes (II) (M11.0)	DMSO	Down	1.71E-09	1.16E-07	TRUE
Monocytes	enriched in myeloid cells and monocytes (M81)	DMSO	Down	7.64E-05	4.72E-04	TRUE
NA	enriched for ubiquitination (M138)	DMSO	Up	0.026010915	0.053598249	TRUE
NA	chromosome Y linked (M240)	DMSO	Down	0.185969159	0.279281276	FALSE
NK Cells	enriched in NK cells (I) (M7.2)	DMSO	Down	6.97E-05	4.72E-04	TRUE
NK Cells	enriched in NK cells (II) (M61.0)	DMSO	Down	7.20E-04	0.002718737	TRUE
NK Cells	enriched in NK cells (III) (M157)	DMSO	Down	0.809852242	0.905034959	FALSE
Nuclear Pore	nuclear pore complex (M106.0)	DMSO	Up	0.002548213	0.007219937	TRUE
Nuclear Pore	nuclear pore, transport; mRNA splicing, processing (M143)	DMSO	Up	0.014789733	0.033523395	TRUE
Nuclear Pore	nuclear pore complex (mitosis) (M106.1)	DMSO	Up	0.055903658	0.100038125	TRUE
Plasma Cells	plasma cells & B cells, immunoglobulins (M156.0)	DMSO	Up	0.179585553	0.277541309	FALSE
Platelets/Coagulation	platelet activation (II) (M32.1)	DMSO	Down	0.78803289	0.905034959	FALSE
Signal Transduction	enriched in G-protein coupled receptors (M130)	DMSO	Down	0.047756469	0.090206664	TRUE
Signal Transduction	small GTPase mediated signal transduction (M215)	DMSO	Up	0.26932166	0.366277458	FALSE
T Cells	signaling in T cells (I) (M35.0)	DMSO	Down	0.037518407	0.075036813	TRUE
T Cells	signaling in T cells (II) (M35.1)	DMSO	Down	0.191139394	0.279281276	FALSE
T Cells	T cell activation (III) (M7.4)	DMSO	Up	0.268325559	0.366277458	FALSE
T Cells	T cell activation (I) (M7.1)	DMSO	Up	0.308086311	0.404228241	FALSE
T Cells	T cell activation and signaling (M5.1)	DMSO	Up	0.408896435	0.524621842	FALSE
T Cells	T cell activation (II) (M7.3)	DMSO	Down	0.662208842	0.804110737	FALSE
T Cells	T cell differentiation (Th2) (M19)	DMSO	Up	0.811869595	0.905034959	FALSE
T Cells	enriched in T cells (I) (M7.0)	DMSO	Up	0.834356885	0.9151011	FALSE
T Cells	T cell differentiation (M14)	DMSO	Down	0.956709914	0.975817583	FALSE
T Cells	T cell differentiation via ITK and PKC (M18)	DMSO	Down	0.959354325	0.975817583	FALSE
T Cells	T cell signaling and costimulation (M44)	DMSO	Down	0.961467324	0.975817583	FALSE
Transcription	spliceosome (M250)	DMSO	Up	3.42E-04	0.001661389	TRUE
Transcription	regulation of transcription, transcription factors (M213)	DMSO	Up	0.025751407	0.053598249	TRUE
Transcription	transcription elongation, RNA polymerase II (M234)	DMSO	Up	0.066321294	0.112746199	TRUE
Translation	translation initiation factor 3 complex (M245)	DMSO	Up	6.25E-04	0.002498948	TRUE
Translation	chaperonin mediated protein folding (I) (M204.0)	DMSO	Up	0.004399868	0.011918174	TRUE
Translation	chaperonin mediated protein folding (II) (M204.1)	DMSO	Up	0.042544209	0.08265732	TRUE
Translation	translation initiation (M227)	DMSO	Up	0.064112253	0.111785466	TRUE
