# Supplementary material for: Transcriptional correlates of malaria in RTS,S/AS01-vaccinated African children: a matched case–control study
Source: eLife. 2022 Jan 21;11:e70393. doi: 10.7554/eLife.70393 (PMC8782572; doi:10.7554/eLife.70393)
Supplement: Figure 5—figure supplement 1—source data 1. [file elife-70393-fig5-figsupp1-data1.csv]

Annotation	BTM	Assay	Variable	n	Correlation	PValue	FDR
Metabolism	nucleotide metabolism (M181)	Antibody	IgM, MSP5	23	0.750988142	5.68E-05	0.013400282
Membrane Transport	intracellular transport (M147)	Antibody	IgM, msp1bl2mad20	23	-0.713438735	1.98E-04	0.046762372
Plasma Cells	plasma cells & B cells, immunoglobulins (M156.0)	Antibody	IgM, cspflwrair	23	0.707509881	2.36E-04	0.055711234
Signal Transduction	enriched in G-protein coupled receptors (M130)	Antibody	IgM, csptrunccterm	23	0.669960474	6.46E-04	0.116566262
Metabolism	nucleotide metabolism (M181)	Antibody	IgM, csptrunccterm	23	0.631422925	0.001569928	0.116566262
Plasma Cells	plasma cells & B cells, immunoglobulins (M156.0)	Antibody	IgM, csptrunccterm	23	0.652173913	9.88E-04	0.116566262
T Cells	signaling in T cells (II) (M35.1)	Antibody	IgM, csptrunccterm	23	0.62055336	0.001975699	0.116566262
Translation	chaperonin mediated protein folding (I) (M204.0)	Antibody	IgG, celtos	23	0.660079051	8.21E-04	0.14595405
Translation	chaperonin mediated protein folding (II) (M204.1)	Antibody	IgG, celtos	23	0.64229249	0.001236899	0.14595405
