# Supplementary material for: Transcriptional correlates of malaria in RTS,S/AS01-vaccinated African children: a matched case–control study
Source: eLife. 2022 Jan 21;11:e70393. doi: 10.7554/eLife.70393 (PMC8782572; doi:10.7554/eLife.70393)
Supplement: Figure 5—source data 1. [file elife-70393-fig5-data1.csv]

Annotation	BTM	Assay	Variable	n	Correlation	PValue	FDR
Translation	translation initiation factor 3 complex (M245)	Antibody	IgG, msp1bl2mad20	42	-0.571636955	7.68E-05	0.018114195
T Cells	T cell activation (I) (M7.1)	Antibody	IgG, msp1bl2r033	42	-0.539848467	2.24E-04	0.027648216
Translation	translation initiation factor 3 complex (M245)	Antibody	IgG, msp1bl2pa17	42	-0.567133944	1.19E-04	0.028015932
T Cells	T cell differentiation (M14)	Antibody	IgG, msp1bl2pa17	42	-0.541690301	2.64E-04	0.031194577
T Cells	T cell differentiation (M14)	Antibody	IgG, msp1bl2r033	42	-0.514241725	4.94E-04	0.034462538
Translation	translation initiation factor 3 complex (M245)	Antibody	IgG, msp1bl2r033	42	-0.508569345	5.84E-04	0.034462538
Dendritic Cells	complement and other receptors in DCs (M40)	Antibody	IgG, ama1fvo	42	-0.532776922	3.45E-04	0.040730496
Monocytes	Monocyte surface signature (S4)	Antibody	IgG, ama1fvo	42	-0.543635038	2.49E-04	0.040730496
Translation	translation initiation factor 3 complex (M245)	Antibody	IgG, celtos	42	-0.53131837	3.60E-04	0.042519975
NK Cells	enriched in NK cells (III) (M157)	Antibody	IgG, ama1fvo	42	-0.505226481	7.55E-04	0.0587769
General Immune	leukocyte differentiation (M160)	Antibody	IgG, ama1fvo	42	-0.485454987	0.001276313	0.0587769
Dendritic Cells	Resting dendritic cell surface signature (S10)	Antibody	IgG, ama1fvo	42	-0.493558059	0.001032817	0.0587769
Inflammatory/TLR/chemokines	TLR and inflammatory signaling (M16)	Antibody	IgG, ama1fvo	42	-0.479296653	0.001494328	0.0587769
Monocytes	enriched in monocytes (II) (M11.0)	Antibody	IgG, ama1fvo	42	-0.470383275	0.001868596	0.062998376
NK Cells	enriched in NK cells (III) (M157)	Antibody	IgM, lsa1	42	0.476966088	0.00140495	0.064177657
ECM and Migration	cell adhesion (GO) (M117)	Antibody	IgM, msp1bl2mad20	42	0.511222753	6.40E-04	0.071283805
Monocytes	enriched in monocytes (II) (M11.0)	Antibody	IgM, msp1bl2mad20	42	0.496961348	9.44E-04	0.071283805
Monocytes	enriched in myeloid cells and monocytes (M81)	Antibody	IgM, msp1bl2mad20	42	0.466655863	0.002048332	0.071283805
NK Cells	enriched in NK cells (III) (M157)	Antibody	IgM, msp1bl2mad20	42	0.465359371	0.00211435	0.071283805
Monocytes	Monocyte surface signature (S4)	Antibody	IgM, msp1bl2mad20	42	0.478324285	0.001531626	0.071283805
T Cells	signaling in T cells (I) (M35.0)	Antibody	IgM, msp1bl2mad20	42	0.468924722	0.001937188	0.071283805
Inflammatory/TLR/chemokines	TLR and inflammatory signaling (M16)	Antibody	IgM, msp1bl2mad20	42	0.528887448	3.87E-04	0.071283805
ECM and Migration	cell adhesion (GO) (M117)	Antibody	IgG, ama1fvo	42	-0.453528887	0.002809503	0.073671414
Dendritic Cells	DC surface signature (S5)	Antibody	IgG, ama1fvo	42	-0.456770116	0.002601404	0.073671414
ECM and Migration	leukocyte activation and migration (M45)	Antibody	IgM, msp1bl2mad20	42	0.45612187	0.002641898	0.077935996
ECM and Migration	leukocyte activation and migration (M45)	Antibody	IgM, lsa1	42	0.427292249	0.00476759	0.080367954
Translation	translation initiation factor 3 complex (M245)	Antibody	IgG, csptruncnanp_rep	42	-0.532290738	3.50E-04	0.082638582
Complement	complement activation (I) (M112.0)	Antibody	IgM, msp6	42	0.448342922	0.003173115	0.082660842
Monocytes	enriched in monocytes (II) (M11.0)	Antibody	IgM, msp6	42	0.439915728	0.003852836	0.082660842
General Immune	immune activation - generic cluster (M37.0)	Antibody	IgM, msp6	42	0.442184588	0.00365829	0.082660842
General Immune	leukocyte differentiation (M160)	Antibody	IgM, msp6	42	0.461469897	0.002323865	0.082660842
General Immune	myeloid cell enriched receptors and transporters (M4.3)	Antibody	IgM, msp6	42	0.446884369	0.003282584	0.082660842
Dendritic Cells	Resting dendritic cell surface signature (S10)	Antibody	IgM, msp6	42	0.464711126	0.002148061	0.082660842
Inflammatory/TLR/chemokines	TLR and inflammatory signaling (M16)	Antibody	IgM, msp6	42	0.501499068	8.35E-04	0.082660842
ECM and Migration	cell adhesion (GO) (M117)	Antibody	IgM, msp6	42	0.433433271	0.004459676	0.083701539
Inflammatory/TLR/chemokines	chemokines and inflammatory molecules in myeloid cells (M86.0)	Antibody	IgM, msp6	42	0.424519893	0.005430204	0.083701539
NA	enriched for ubiquitination (M138)	Antibody	IgM, msp6	42	0.430678227	0.004741972	0.083701539
NK Cells	enriched in NK cells (III) (M157)	Antibody	IgM, msp6	42	0.421116603	0.005846781	0.083701539
General Immune	myeloid cell enriched receptors and transporters (M4.3)	Antibody	IgM, lsa1	42	0.417730238	0.005912346	0.083707903
Dendritic Cells	DC surface signature (S5)	Antibody	IgM, msp6	42	0.405558707	0.008126276	0.087172779
Monocytes	Monocyte surface signature (S4)	Antibody	IgM, msp6	42	0.406369014	0.007990893	0.087172779
ECM and Migration	cell adhesion (GO) (M117)	Antibody	IgG, AMA13D7	42	-0.472328012	0.001780498	0.087492251
Dendritic Cells	complement and other receptors in DCs (M40)	Antibody	IgG, AMA13D7	42	-0.481565513	0.001410425	0.087492251
NK Cells	enriched in NK cells (III) (M157)	Antibody	IgG, AMA13D7	42	-0.479458715	0.001488191	0.087492251
General Immune	leukocyte differentiation (M160)	Antibody	IgG, AMA13D7	42	-0.470707398	0.001853649	0.087492251
Monocytes	Monocyte surface signature (S4)	Antibody	IgG, AMA13D7	42	-0.508305648	6.94E-04	0.087492251
T Cells	T cell differentiation via ITK and PKC (M18)	Antibody	IgM, msp6	42	0.401020987	0.008921764	0.088533559
T Cells	enriched in T cells (I) (M7.0)	Antibody	IgG, msp1bl2r033	42	-0.459300677	0.002215299	0.09316041
T Cells	T cell activation (III) (M7.4)	Antibody	IgG, msp1bl2r033	42	-0.456626555	0.002368485	0.09316041
Membrane Transport	transmembrane transport (I) (M87)	Antibody	IgG, ama1fvo	42	-0.437646868	0.004056418	0.095731454
General Immune	immune activation - generic cluster (M37.0)	Antibody	IgG, ama1fvo	42	-0.432460903	0.00455758	0.097780813
Dendritic Cells	complement and other receptors in DCs (M40)	Antibody	IgM, msp1bl2mad20	42	0.435702131	0.004238374	0.100025623
Inflammatory/TLR/chemokines	chemokines and inflammatory molecules in myeloid cells (M86.0)	Antibody	IgM, msp1bl2mad20	42	0.430678227	0.004741972	0.101736858
Inflammatory/TLR/chemokines	proinflammatory cytokines and chemokines (M29)	Antibody	IgM, msp6	42	0.386921643	0.011838017	0.102568125
T Cells	enriched in T cells (I) (M7.0)	Antibody	IgG, msp2flch150	42	-0.499878454	8.73E-04	0.102974757
T Cells	T cell activation and signaling (M5.1)	Antibody	IgG, msp2flch150	42	-0.521432623	4.80E-04	0.102974757
Complement	complement activation (I) (M112.0)	Antibody	IgG, ama1fvo	42	-0.425978446	0.005259765	0.103442043
Dendritic Cells	Resting dendritic cell surface signature (S10)	Antibody	IgM, msp1bl2mad20	42	0.425492262	0.005316051	0.104548996
Monocytes	enriched in myeloid cells and monocytes (M81)	Antibody	IgM, msp6	42	0.378818572	0.013858967	0.105506975
Inflammatory/TLR/chemokines	chemokines and inflammatory molecules in myeloid cells (M86.0)	Antibody	IgM, bsa	42	0.489605716	9.99E-04	0.106318878
T Cells	T cell differentiation (Th2) (M19)	Antibody	IgG, msp1bl2r033	42	-0.444471456	0.003188498	0.107497938
Membrane Transport	transmembrane transport (I) (M87)	Antibody	IgM, msp6	42	0.370877563	0.016118912	0.11188421
Inflammatory/TLR/chemokines	TLR and inflammatory signaling (M16)	Antibody	IgM, lsa1	42	0.387990762	0.011119762	0.114098426
Translation	translation initiation factor 3 complex (M245)	Antibody	IgG, cspflwrair	42	-0.5211085	4.84E-04	0.114331577
ECM and Migration	cell adhesion (GO) (M117)	Antibody	IgM, lsa1	42	0.384587335	0.011911822	0.117113341
T Cells	T cell activation (II) (M7.3)	Antibody	IgM, msp1bl2mad20	42	0.403451908	0.008487616	0.133538498
Cell Cycle	cell cycle, ATP binding (M144)	Antibody	IgM, msp1bl2mad20	42	0.399886557	0.009130854	0.134680096
Monocytes	enriched in monocytes (II) (M11.0)	Antibody	IgM, bsa	42	0.433926337	0.004091505	0.136343126
Monocytes	enriched in myeloid cells and monocytes (M81)	Antibody	IgM, bsa	42	0.423471257	0.005199526	0.136343126
General Immune	leukocyte differentiation (M160)	Antibody	IgM, bsa	42	0.431738065	0.004304622	0.136343126
T Cells	T cell differentiation via ITK and PKC (M18)	Antibody	IgM, bsa	42	0.424849058	0.00504001	0.136343126
Membrane Transport	transmembrane transport (I) (M87)	Antibody	IgM, lsa1	42	0.363842632	0.017854059	0.137020258
T Cells	T cell activation and signaling (M5.1)	Antibody	IgM, msp6	42	0.351916376	0.02281536	0.13806218
ECM and Migration	leukocyte activation and migration (M45)	Antibody	IgG, msp2fldd2	42	-0.437583567	0.00375584	0.13846399
T Cells	T cell differentiation (Th2) (M19)	Antibody	IgG, ama1fvo	42	-0.405396645	0.00815359	0.139789743
T Cells	signaling in T cells (I) (M35.0)	Antibody	IgM, msp6	42	0.346892472	0.02493907	0.143551718
Monocytes	enriched in monocytes (II) (M11.0)	Antibody	IgM, lsa1	42	0.357035777	0.020280787	0.14484065
ECM and Migration	leukocyte activation and migration (M45)	Antibody	IgG, msp2flch150	42	-0.453366826	0.002820283	0.148643668
T Cells	T cell differentiation (Th2) (M19)	Antibody	IgG, msp2flch150	42	-0.448667045	0.00314923	0.148643668
General Immune	immune activation - generic cluster (M37.0)	Antibody	IgM, msp1bl2mad20	42	0.391459363	0.010821047	0.1502216
Inflammatory/TLR/chemokines	proinflammatory cytokines and chemokines (M29)	Antibody	IgM, bsa	42	0.413988743	0.006421195	0.151540213
Monocytes	enriched in myeloid cells and monocytes (M81)	Antibody	IgG, ama1fvo	42	-0.393566162	0.010375058	0.153032107
ECM and Migration	leukocyte activation and migration (M45)	Antibody	IgG, ama1fvo	42	-0.394700592	0.010141541	0.153032107
T Cells	enriched in T cells (I) (M7.0)	Antibody	IgG, msp1423d7	42	-0.46746617	0.002008005	0.157963041
T Cells	T cell activation and signaling (M5.1)	Antibody	IgM, msp1bl2mad20	42	0.385301029	0.012220603	0.160225685
Monocytes	Monocyte surface signature (S4)	Antibody	IgM, lsa1	42	0.346015154	0.024793902	0.1625378
Mitochondria	respiratory electron transport chain (mitochondrion) (M216)	Antibody	IgG, msp2flch150	42	-0.417713313	0.006290978	0.164963433
ECM and Migration	cell adhesion (GO) (M117)	Antibody	IgG, msp2fldd2	42	-0.396985536	0.009239621	0.165260015
ECM and Migration	cell adhesion (GO) (M117)	Antibody	IgG, msp1423d7	42	-0.429543797	0.004862686	0.165426541
NK Cells	enriched in NK cells (II) (M61.0)	Antibody	IgG, msp1423d7	42	-0.413013532	0.0069526	0.165426541
T Cells	T cell activation and signaling (M5.1)	Antibody	IgG, msp1423d7	42	-0.4047484	0.008263643	0.165426541
T Cells	T cell differentiation (Th2) (M19)	Antibody	IgG, msp1423d7	42	-0.423223402	0.005585737	0.165426541
Signal Transduction	small GTPase mediated signal transduction (M215)	Antibody	IgM, msp6	42	0.333603436	0.031370199	0.167573041
T Cells	T cell differentiation via ITK and PKC (M18)	Antibody	IgM, lsa1	42	0.331672137	0.03189179	0.175563223
Translation	translation initiation factor 3 complex (M245)	Antibody	IgM, lsa1	42	0.330618695	0.032473165	0.175563223
Inflammatory/TLR/chemokines	TLR and inflammatory signaling (M16)	Antibody	IgG, AMA13D7	42	-0.433109148	0.004492104	0.176689428
Metabolism	heme biosynthesis (II) (M222)	Antibody	IgG, ama1fvo	42	-0.381249494	0.01322381	0.183577591
Dendritic Cells	Resting dendritic cell surface signature (S10)	Antibody	IgM, bsa	42	0.396239421	0.009384444	0.184560725
Mitochondria	respiratory electron transport chain (mitochondrion) (M238)	Antibody	IgM, bsa	42	0.392268112	0.010188489	0.184960256
Dendritic Cells	Resting dendritic cell surface signature (S10)	Antibody	IgM, lsa1	42	0.320408412	0.038573395	0.185782068
Metabolism	proteasome (M226)	Antibody	IgM, msp6	42	0.324041812	0.036805641	0.18633169
Translation	chaperonin mediated protein folding (I) (M204.0)	Antibody	IgG, msp1bl2r033	42	-0.408249261	0.007275344	0.190775689
General Immune	myeloid cell enriched receptors and transporters (M4.3)	Antibody	IgM, bsa	42	0.385946436	0.01158994	0.195373266
Metabolism	heme biosynthesis (II) (M222)	Antibody	IgM, msp6	42	0.319342031	0.039749818	0.195436606
Monocytes	enriched in monocytes (II) (M11.0)	Antibody	IgG, AMA13D7	42	-0.402641601	0.008630253	0.197198183
Dendritic Cells	Resting dendritic cell surface signature (S10)	Antibody	IgG, AMA13D7	42	-0.42079248	0.005887873	0.197198183
T Cells	T cell differentiation (Th2) (M19)	Antibody	IgG, AMA13D7	42	-0.412041164	0.0070968	0.197198183
Membrane Transport	transmembrane transport (I) (M87)	Antibody	IgG, AMA13D7	42	-0.40247954	0.008659028	0.197198183
B Cells	enriched in naive and memory B cells (M83)	Antibody	IgG, msp2fldd2	42	0.352092703	0.022211569	0.199874985
Transcription	transcription elongation, RNA polymerase II (M234)	Antibody	IgG, msp2fldd2	42	-0.357359913	0.02015926	0.199874985
