# Supplementary material for: Transcriptional correlates of malaria in RTS,S/AS01-vaccinated African children: a matched case–control study
Source: eLife. 2022 Jan 21;11:e70393. doi: 10.7554/eLife.70393 (PMC8782572; doi:10.7554/eLife.70393)
Supplement: Figure 6—figure supplement 9—source data 1. [file elife-70393-fig6-figsupp9-data1.csv]

Annotation	BTM	Assay	Variable	n	Correlation	PValue	FDR
ECM and Migration	cell adhesion (GO) (M117)	PFS	csp, CD4	33	0.476604278	0.00551448	0.043161905
NK Cells	enriched in NK cells (III) (M157)	PFS	csp, CD4	33	0.483622995	0.004790705	0.043161905
General Immune	immune activation - generic cluster (M37.0)	PFS	csp, CD4	33	0.485628342	0.00459966	0.043161905
Monocytes	Monocyte surface signature (S4)	PFS	csp, CD4	33	0.490641711	0.004150653	0.043161905
General Immune	myeloid cell enriched receptors and transporters (M4.3)	PFS	csp, CD4	33	0.479278075	0.005228337	0.043161905
Plasma Cells	plasma cells & B cells, immunoglobulins (M156.0)	PFS	csp, CD4	33	0.542780749	0.001304689	0.043161905
T Cells	T cell differentiation (Th2) (M19)	PFS	csp, CD4	33	0.473596257	0.005852462	0.043161905
Membrane Transport	transmembrane transport (I) (M87)	PFS	csp, CD4	33	0.515374332	0.002448054	0.043161905
Complement	complement activation (I) (M112.0)	PFS	csp, CD4	33	0.444518717	0.010152361	0.052081992
Monocytes	enriched in monocytes (II) (M11.0)	PFS	csp, CD4	33	0.450534759	0.009090574	0.052081992
Mitochondria	respiratory electron transport chain (mitochondrion) (M219)	PFS	csp, CD4	33	0.447860963	0.009550128	0.052081992
Mitochondria	respiratory electron transport chain (mitochondrion) (M238)	PFS	csp, CD4	33	0.442179144	0.010592948	0.052081992
Dendritic Cells	DC surface signature (S5)	PFS	csp, CD4	33	0.411430481	0.018075774	0.056055503
Membrane Transport	intracellular transport (M147)	PFS	csp, CD4	33	0.41276738	0.017676523	0.056055503
Mitochondria	respiratory electron transport chain (mitochondrion) (M216)	PFS	csp, CD4	33	0.40842246	0.019001866	0.056055503
Mitochondria	respiratory electron transport chain (mitochondrion) (M231)	PFS	csp, CD4	33	0.424131016	0.014572599	0.056055503
Dendritic Cells	Resting dendritic cell surface signature (S10)	PFS	csp, CD4	33	0.416778075	0.016522987	0.056055503
T Cells	T cell activation (I) (M7.1)	PFS	csp, CD4	33	0.42513369	0.014322375	0.056055503
T Cells	T cell activation (II) (M7.3)	PFS	csp, CD4	33	0.408756684	0.01889704	0.056055503
Inflammatory/TLR/chemokines	TLR and inflammatory signaling (M16)	PFS	csp, CD4	33	0.420120321	0.015610787	0.056055503
Dendritic Cells	complement and other receptors in DCs (M40)	PFS	csp, CD4	33	0.405414439	0.019967443	0.056099007
Cell Cycle	cell cycle, ATP binding (M144)	PFS	csp, CD4	33	0.37934492	0.03018749	0.063325476
B Cells	enriched in B cells (VI) (M69)	PFS	csp, CD4	33	0.377673797	0.030968	0.063325476
Monocytes	enriched in myeloid cells and monocytes (M81)	PFS	csp, CD4	33	0.377339572	0.031126082	0.063325476
B Cells	enriched in naive and memory B cells (M83)	PFS	csp, CD4	33	0.384692513	0.027798197	0.063325476
ECM and Migration	leukocyte activation and migration (M45)	PFS	csp, CD4	33	0.379679144	0.030033353	0.063325476
Metabolism	proteasome (M226)	PFS	csp, CD4	33	0.388368984	0.026248141	0.063325476
Signal Transduction	small GTPase mediated signal transduction (M215)	PFS	csp, CD4	33	0.382352941	0.028823496	0.063325476
T Cells	T cell signaling and costimulation (M44)	PFS	csp, CD4	33	0.38302139	0.028527413	0.063325476
T Cells	enriched in T cells (I) (M7.0)	PFS	csp, CD4	33	0.369318182	0.035124166	0.066849218
T Cells	T cell differentiation (M14)	PFS	csp, CD4	33	0.369318182	0.035124166	0.066849218
T Cells	T cell activation and signaling (M5.1)	PFS	csp, CD4	33	0.36697861	0.036366523	0.067050776
B Cells	B cell surface signature (S2)	PFS	csp, CD4	33	0.351270053	0.0456706	0.078089851
NK Cells	enriched in NK cells (I) (M7.2)	PFS	csp, CD4	33	0.35026738	0.046324488	0.078089851
T Cells	T cell differentiation via ITK and PKC (M18)	PFS	csp, CD4	33	0.351604278	0.045454305	0.078089851
B Cells	enriched in B cells (I) (M47.0)	PFS	csp, CD4	33	0.333890374	0.058118384	0.095249573
T Cells	T cell activation (III) (M7.4)	PFS	csp, CD4	33	0.328877005	0.062172897	0.099140566
NK Cells	enriched in NK cells (II) (M61.0)	PFS	csp, CD4	33	0.317847594	0.071884855	0.111610695
Transcription	transcription elongation, RNA polymerase II (M234)	PFS	csp, CD4	33	0.313502674	0.076023922	0.115010549
Signal Transduction	enriched in G-protein coupled receptors (M130)	PFS	csp, CD4	33	0.310494652	0.078997331	0.116521063
T Cells	signaling in T cells (I) (M35.0)	PFS	csp, CD4	33	0.301804813	0.088099924	0.126777939
B Cells	enriched in B cells (II) (M47.1)	PFS	csp, CD4	33	0.294451872	0.09642014	0.13544734
NA	enriched for ubiquitination (M138)	PFS	csp, CD4	33	0.288101604	0.104081389	0.142809348
Metabolism	nucleotide metabolism (M181)	PFS	csp, CD4	33	0.285427807	0.107442982	0.144071271
General Immune	leukocyte differentiation (M160)	PFS	csp, CD4	33	0.27907754	0.115757886	0.148472072
Translation	translation initiation factor 3 complex (M245)	PFS	csp, CD4	33	0.280080214	0.114413611	0.148472072
B Cells	enriched in B cells (III) (M47.2)	PFS	csp, CD4	33	0.270721925	0.127428849	0.159963875
Translation	chaperonin mediated protein folding (I) (M204.0)	PFS	csp, CD4	33	0.262700535	0.139441174	0.171396443
Antigen Presentation	antigen processing and presentation (M200)	PFS	csp, CD4	33	0.255681818	0.150623065	0.175520779
NA	chromosome Y linked (M240)	PFS	csp, CD4	33	0.255013369	0.151721351	0.175520779
ECM and Migration	leukocyte migration (M88.0)	PFS	csp, CD4	33	0.25802139	0.146824998	0.175520779
Inflammatory/TLR/chemokines	proinflammatory cytokines and chemokines (M29)	PFS	csp, CD4	33	0.252673797	0.15561159	0.176559304
B Cells	B cell surface signature (S2)	PFS	hbs, CD8	33	0.626047077	9.75E-05	0.003431099
B Cells	Naive B cell surface signature (S8)	PFS	hbs, CD8	33	0.620690525	1.16E-04	0.003431099
B Cells	enriched in B cells (III) (M47.2)	PFS	hbs, CD8	33	0.517242104	0.002053206	0.040379727
B Cells	enriched in B cells (II) (M47.1)	PFS	hbs, CD8	33	0.469367916	0.005857442	0.086397269
B Cells	enriched in B cells (I) (M47.0)	PFS	hbs, CD8	33	0.439906877	0.010414667	0.122893071
Metabolism	nucleotide metabolism (M181)	PFS	hbs, CD8	33	0.427519849	0.013077461	0.128595031
Signal Transduction	enriched in G-protein coupled receptors (M130)	PFS	hbs, CD8	33	0.397054457	0.022142166	0.135784144
ECM and Migration	leukocyte migration (M88.0)	PFS	hbs, CD8	33	0.40542407	0.01924743	0.135784144
T Cells	signaling in T cells (I) (M35.0)	PFS	hbs, CD8	33	0.39805881	0.021776866	0.135784144
T Cells	signaling in T cells (II) (M35.1)	PFS	hbs, CD8	33	0.394710965	0.023014262	0.135784144
B Cells	enriched in B cells (VI) (M69)	PFS	hbs, CD8	33	0.374958677	0.031550649	0.147713487
B Cells	enriched in naive and memory B cells (M83)	PFS	hbs, CD8	33	0.37294997	0.03254704	0.147713487
Cell Cycle	mitotic cell cycle in stimulated CD4 T cells (M4.9)	PFS	hbs, CD8	33	0.383328291	0.027663007	0.147713487
Complement	complement activation (I) (M112.0)	PFS	hbs, CD8	33	0.364245572	0.037164947	0.155241145
Membrane Transport	intracellular transport (M147)	PFS	hbs, CD8	33	0.360228158	0.039468088	0.155241145
Dendritic Cells	DC surface signature (S5)	PFS	hbs, CD8	33	0.338801948	0.053768136	0.186607061
General Immune	immune activation - generic cluster (M37.0)	PFS	hbs, CD8	33	0.339471517	0.053266377	0.186607061
