# Supplementary material for: Transcriptional correlates of malaria in RTS,S/AS01-vaccinated African children: a matched case–control study
Source: eLife. 2022 Jan 21;11:e70393. doi: 10.7554/eLife.70393 (PMC8782572; doi:10.7554/eLife.70393)
Supplement: Supplementary file 3. [file elife-70393-supp3.csv]

Annotation	BTM
Antigen Presentation	antigen processing and presentation (M200)
Antigen Presentation	enriched in antigen presentation (III) (M95.1)
B Cells	B cell surface signature (S2)
B Cells	enriched in B cells (I) (M47.0)
B Cells	enriched in B cells (II) (M47.1)
B Cells	enriched in B cells (III) (M47.2)
B Cells	enriched in B cells (VI) (M69)
B Cells	Naive B cell surface signature (S8)
Cell Cycle	cell cycle, ATP binding (M144)
Cell Cycle	cell division (M37.3)
Cell Cycle	mismatch repair (I) (M22.0)
Cell Cycle	mitosis (TF motif CCAATNNSNNNGCG) (M169)
Cell Cycle	mitotic cell cycle in stimulated CD4 T cells (M4.9)
Complement	complement activation (I) (M112.0)
Dendritic Cells	complement and other receptors in DCs (M40)
Dendritic Cells	DC surface signature (S5)
Dendritic Cells	enriched in activated dendritic cells/monocytes (M64)
ECM and Migration	cell adhesion (GO) (M117)
ECM and Migration	cytoskeletal remodeling (M32.8)
ECM and Migration	leukocyte activation and migration (M45)
ECM and Migration	leukocyte migration (M88.0)
General Immune	immune activation - generic cluster (M37.0)
General Immune	leukocyte differentiation (M160)
General Immune	myeloid cell enriched receptors and transporters (M4.3)
Inflammatory/TLR/chemokines	chemokines and inflammatory molecules in myeloid cells (M86.0)
Inflammatory/TLR/chemokines	proinflammatory cytokines and chemokines (M29)
Membrane Transport	enriched in membrane proteins (M124)
Membrane Transport	intracellular transport (M147)
Membrane Transport	transmembrane transport (I) (M87)
Metabolism	heme biosynthesis (II) (M222)
Metabolism	proteasome (M226)
Metabolism	purine nucleotide biosynthesis (M212)
Mitochondria	respiratory electron transport chain (mitochondrion) (M216)
Mitochondria	respiratory electron transport chain (mitochondrion) (M219)
Mitochondria	respiratory electron transport chain (mitochondrion) (M231)
Mitochondria	respiratory electron transport chain (mitochondrion) (M238)
Monocytes	enriched in monocytes (II) (M11.0)
Monocytes	enriched in myeloid cells and monocytes (M81)
NK Cells	enriched in NK cells (I) (M7.2)
NK Cells	enriched in NK cells (II) (M61.0)
NK Cells	enriched in NK cells (III) (M157)
Nuclear Pore	nuclear pore complex (M106.0)
Nuclear Pore	nuclear pore complex (mitosis) (M106.1)
Nuclear Pore	nuclear pore, transport; mRNA splicing, processing (M143)
Plasma Cells	plasma cells & B cells, immunoglobulins (M156.0)
Platelets/Coagulation	platelet activation (II) (M32.1)
Signal Transduction	enriched in G-protein coupled receptors (M130)
Signal Transduction	small GTPase mediated signal transduction (M215)
T Cells	enriched in T cells (I) (M7.0)
T Cells	signaling in T cells (I) (M35.0)
T Cells	signaling in T cells (II) (M35.1)
T Cells	T cell activation (I) (M7.1)
T Cells	T cell activation (II) (M7.3)
T Cells	T cell activation (III) (M7.4)
T Cells	T cell activation and signaling (M5.1)
T Cells	T cell differentiation (M14)
T Cells	T cell differentiation (Th2) (M19)
T Cells	T cell differentiation via ITK and PKC (M18)
T Cells	T cell signaling and costimulation (M44)
Transcription	regulation of transcription, transcription factors (M213)
Transcription	spliceosome (M250)
Transcription	transcription elongation, RNA polymerase II (M234)
Translation	chaperonin mediated protein folding (I) (M204.0)
Translation	chaperonin mediated protein folding (II) (M204.1)
Translation	translation initiation (M227)
Translation	translation initiation factor 3 complex (M245)
NA	chromosome Y linked (M240)
NA	enriched for ubiquitination (M138)
